# Supplementary material for: The Utility of Shallow RNA-Seq for Documenting Differential Gene Expression in Genes with High and Low Levels of Expression
Source: PubMed Central journal article supplement (PMC3865247; doi:10.1371/journal.pone.0084160), 2013-12-16

GB16016

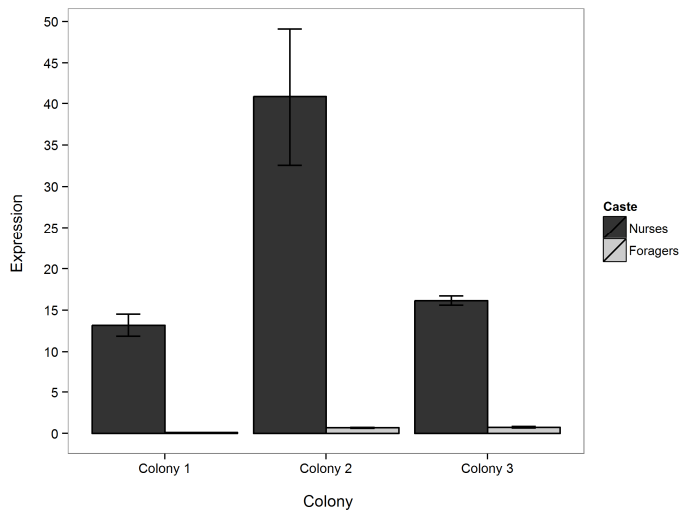

GB16903

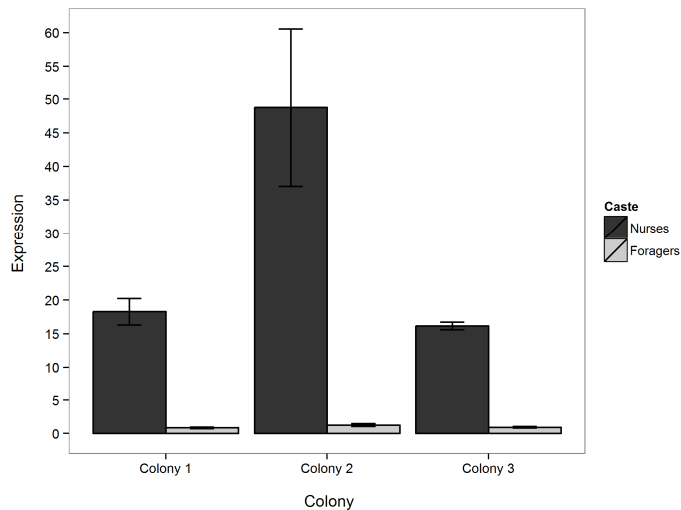

GB13791

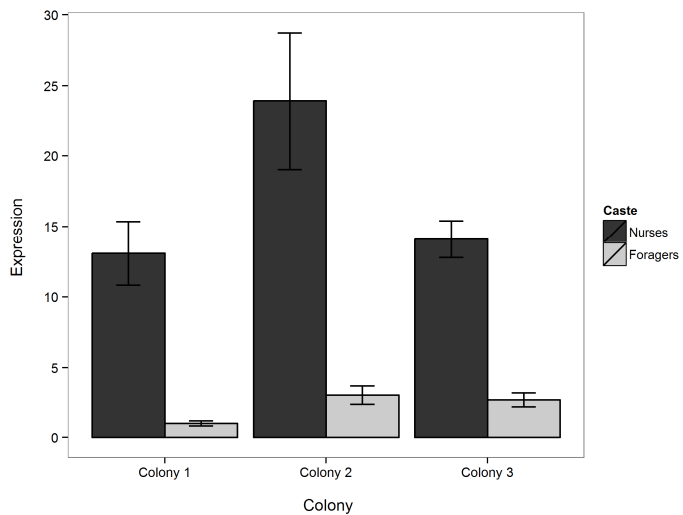

GB13966

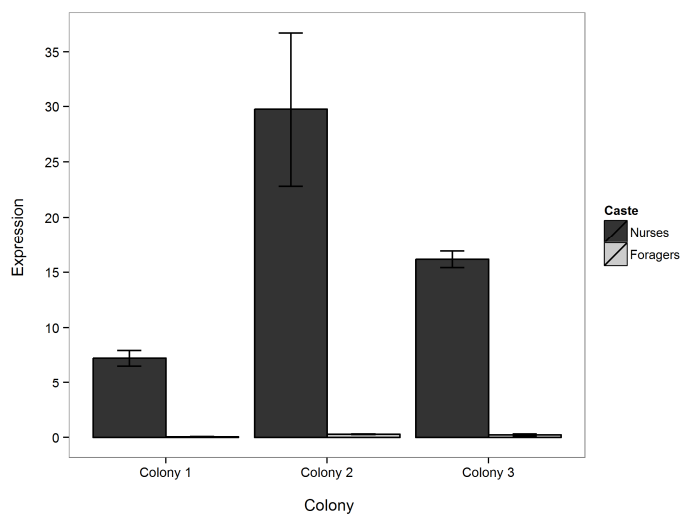

GB14261

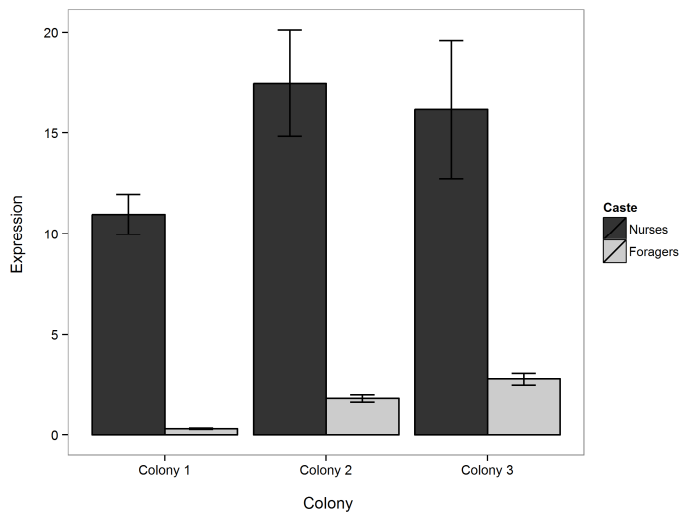

GB14596

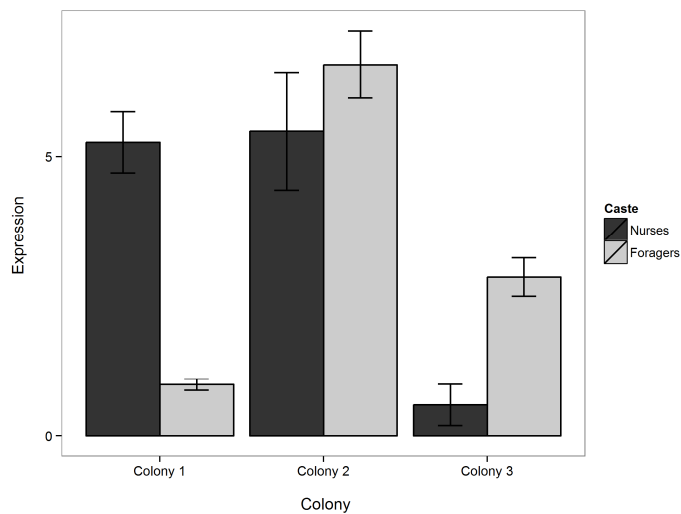

GB18312

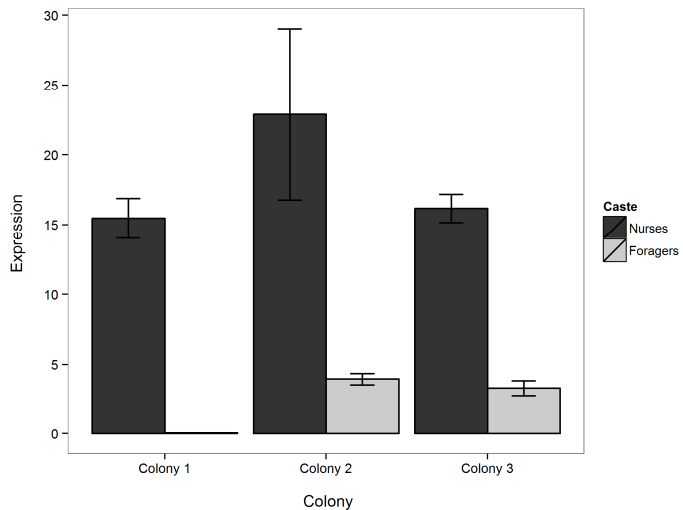

GB18912

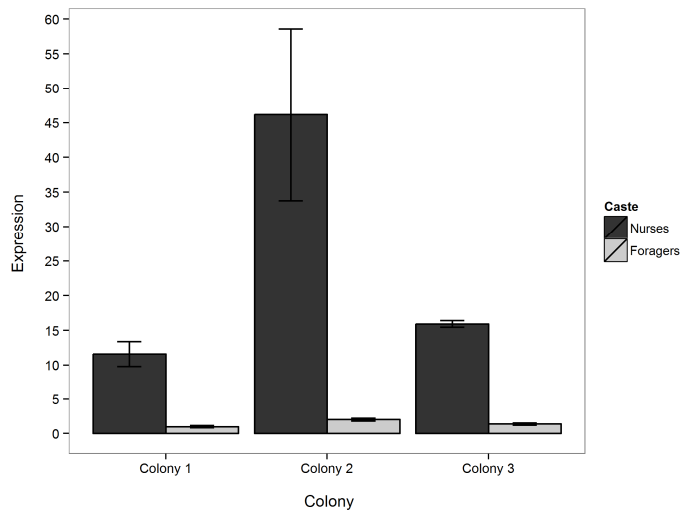

GB13450

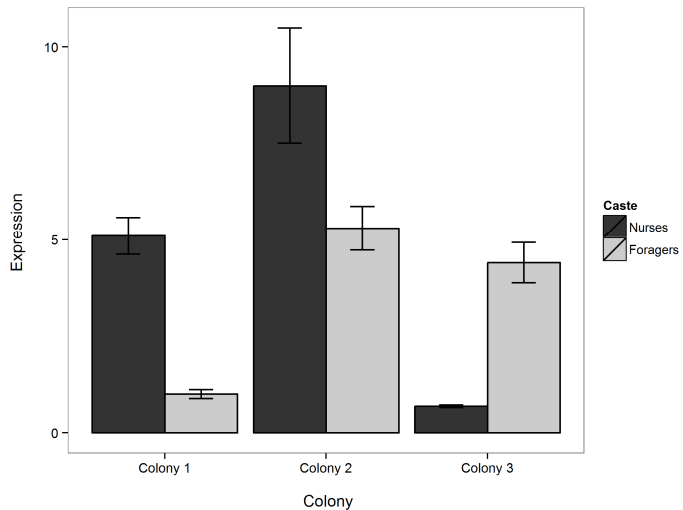

GB19617

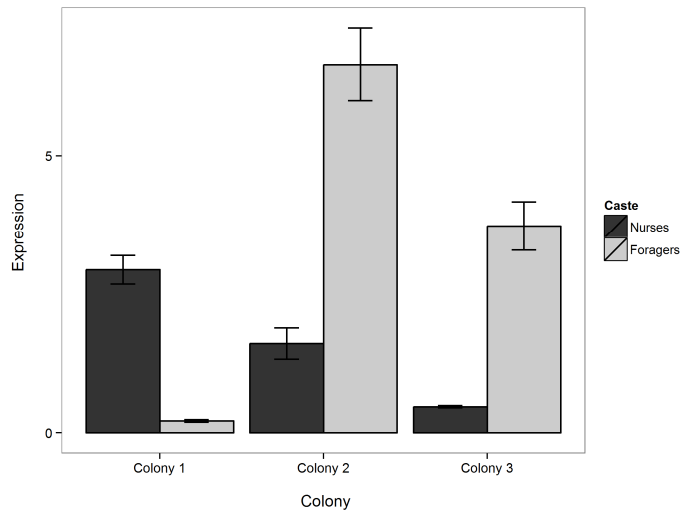

Supplement: pone.0084160.s001.pdf [file pone.0084160.s001.pdf]
