# Supplementary material for: The Utility of Shallow RNA-Seq for Documenting Differential Gene Expression in Genes with High and Low Levels of Expression
Source: PubMed Central journal article supplement (PMC3865247; doi:10.1371/journal.pone.0084160), 2013-12-16
Supplement: pone.0084160.s004.pdf [file pone.0084160.s004.pdf]

Table S3.

|              | Forager  | Nurse    | M    | D        | prob |
|--------------|----------|----------|------|----------|------|
| GB11552      | 0.58     | 32.35    | 5.81 | 31.77    | 0.95 |
| GB13351      | 846      | 26,053   | 4.94 | 25,206   | 1.00 |
| GB13285      | 947      | 24,109   | 4.67 | 23,162   | 1.00 |
| GB19783      | 127.56   | 2,109.53 | 4.05 | 1,981.97 | 1.00 |
| GB19804      | 474.36   | 4,589.24 | 3.27 | 4,114.88 | 0.99 |
| GB18543      | 96.28    | 729.82   | 2.92 | 633.54   | 0.99 |
| GB18161      | 8,425    | 52,708   | 2.65 | 44,282   | 0.99 |
| GB14496      | 17.18    | 105.03   | 2.61 | 87.86    | 0.97 |
| GB10355      | 167,302  | 958,372  | 2.52 | 791,069  | 0.98 |
| GB16587      | 457.51   | 1,286.56 | 1.49 | 829.05   | 0.95 |
| GB13967      | 6,475.49 | 4,073.50 | 0.67 | 2,401.99 | 0.86 |
| Focal mean   | 16,834   | 97,652   | 3.00 | 81,255   | 1.00 |
| Overall mean | 611.67   | 1451.22  | 1.13 | 1207.47  | 0.86 |
