# Supplementary material for: The Utility of Shallow RNA-Seq for Documenting Differential Gene Expression in Genes with High and Low Levels of Expression
Source: PubMed Central journal article supplement (PMC3865247; doi:10.1371/journal.pone.0084160), 2013-12-16
Supplement: pone.0084160.s009.pdf [file pone.0084160.s009.pdf]

Table S8.

|                     | All genes (n) | Transcription factors (n) | t    | p-value |
|---------------------|---------------|---------------------------|------|---------|
| SG N                | 6692          | 207                       | 1.56 | 0.12    |
| SG N minus melittin | 6691          | 207                       | 5.88 | <0.001  |
| SG F                | 7025          | 231                       | 3.41 | <0.001  |
| DT F                | 5583          | 153                       | 5.59 | <0.001  |
| DT F                | 6105          | 186                       | 3.95 | <0.001  |
