# Supplementary material for: The Utility of Shallow RNA-Seq for Documenting Differential Gene Expression in Genes with High and Low Levels of Expression
Source: PLoS One. 2013 Dec 16;8(12):e84160. doi: 10.1371/journal.pone.0084160 (PMC3865247; doi:10.1371/journal.pone.0084160)
Supplement: Table S6 — Annotations for honey bee genes identified as having a domain associated with DNA binding in the context of gene regulation. (XLSX) [file pone.0084160.s007.xlsx]

## Sheet: Table S6
Seq. Name	Seq. Description	Seq. Length	GOs	InterProScan
GB10077	photoreceptor-specific nuclear receptor	660	P:steroid hormone mediated signaling pathway; P:intracellular receptor mediated signaling pathway; F:zinc ion binding; P:regulation of transcription, DNA-dependent; F:sequence-specific DNA binding; F:steroid hormone receptor activity; F:ligand-activated sequence-specific DNA binding RNA polymerase II transcription factor activity; C:nucleus	IPR000536; IPR001628; IPR001723; IPR008946; IPR013088; PTHR24083 (PANTHER), PTHR24083:SF30 (PANTHER), SSF57716 (SUPERFAMILY)
GB10093	myst histone	1142	C:nucleosome; F:transferase activity, transferring acyl groups other than amino-acyl groups; F:zinc ion binding; P:regulation of transcription, DNA-dependent; F:DNA binding; P:nucleosome assembly; C:nucleus; F:protein binding	IPR001965; IPR002717; IPR005818; IPR011011; IPR011991; IPR013083; IPR015880; IPR016181; IPR019786; IPR019787; G3DSA:3.30.60.60 (GENE3D), PTHR10615 (PANTHER), PTHR10615:SF75 (PANTHER), SSF46785 (SUPERFAMILY)
GB10114	zinc finger protein 691-like	373	F:zinc ion binding; F:nucleic acid binding; C:intracellular	IPR007087; IPR013087; IPR015880; PTHR23223 (PANTHER), PTHR23223:SF48 (PANTHER), PF13465 (PFAM), SSF57667 (SUPERFAMILY)
GB10135	transcription initiation factor tfiid subunit 13	127	F:DNA binding; P:translational initiation; F:translation initiation factor activity; P:transcription from RNA polymerase II promoter; F:protein heterodimerization activity	IPR003195; IPR009072; PTHR11380:SF6 (PANTHER)
GB10201	neuronal pas domain-containing protein 2	409	P:transcription, DNA-dependent; F:signal transducer activity; P:signal transduction; F:sequence-specific DNA binding transcription factor activity; C:transcription factor complex; C:cytoplasm; F:protein dimerization activity	IPR000014; IPR001067; IPR001610; IPR011598; IPR013655; IPR013767; G3DSA:3.30.450.20 (GENE3D), PTHR23042 (PANTHER), PTHR23042:SF8 (PANTHER), SSF55785 (SUPERFAMILY)
GB10221	homeobox protein unc-4	495	F:sequence-specific DNA binding transcription factor activity; F:sequence-specific DNA binding; C:nucleus; P:regulation of transcription, DNA-dependent	IPR001356; IPR009057; IPR017970; PTHR24329 (PANTHER), PTHR24329:SF28 (PANTHER)
GB10270	homeodomain transcription factor-like	176	F:DNA binding	PTHR12680 (PANTHER), PTHR12680:SF1 (PANTHER)
GB10285	kynurenine alpha-aminoadipate mitochondrial-like	748	F:pyridoxal phosphate binding; P:biosynthetic process; F:transaminase activity; F:transcription regulatory region sequence-specific DNA binding; F:sequence-specific DNA binding transcription factor activity; C:nucleus	IPR000047; IPR001356; IPR003654; IPR004839; IPR009057; IPR015421; IPR015422; IPR015424; IPR017970; PTHR11751 (PANTHER), PTHR11751:SF15 (PANTHER)
GB10313	forkhead box protein p4	485	F:sequence-specific DNA binding transcription factor activity; F:sequence-specific DNA binding; C:intracellular; F:zinc ion binding; P:regulation of transcription, DNA-dependent	IPR001766; IPR011991; IPR015880; IPR018122; PTHR11829 (PANTHER), PTHR11829:SF50 (PANTHER), SSF46785 (SUPERFAMILY)
GB10331	nuclear hormone receptor hr96	696	F:sequence-specific DNA binding transcription factor activity; P:transcription, DNA-dependent; F:steroid hormone receptor activity; C:nucleus; P:steroid hormone mediated signaling pathway; F:zinc ion binding; F:sequence-specific DNA binding	IPR000536; IPR001628; IPR008946; IPR013088; PTHR24082 (PANTHER), PTHR24082:SF29 (PANTHER), SSF57716 (SUPERFAMILY)
GB10341	homeobox protein abdominal-b	521	F:sequence-specific DNA binding transcription factor activity; F:sequence-specific DNA binding; C:nucleus; P:regulation of transcription, DNA-dependent	IPR001356; IPR009057; IPR017970; IPR020479; PTHR24326 (PANTHER), PTHR24326:SF31 (PANTHER)
GB10368	barh-like 2 homeobox	222	F:sequence-specific DNA binding transcription factor activity; F:sequence-specific DNA binding; C:nucleus; P:regulation of transcription, DNA-dependent	IPR001356; IPR009057; IPR017970; IPR020479; PTHR24329 (PANTHER), PTHR24329:SF145 (PANTHER)
GB10501	forkhead box protein l2	509	F:sequence-specific DNA binding transcription factor activity; F:sequence-specific DNA binding; C:nucleus; P:regulation of transcription, DNA-dependent	IPR001766; IPR011991; IPR018122; PTHR11829 (PANTHER), SSF46785 (SUPERFAMILY)
GB10525	transcription factor sox-21	332	F:protein binding	IPR009071; PTHR10270 (PANTHER), PTHR10270:SF160 (PANTHER)
GB10529	fork head domain-containing protein crocodile	458	F:sequence-specific DNA binding transcription factor activity; F:sequence-specific DNA binding; C:nucleus; P:regulation of transcription, DNA-dependent	IPR001766; IPR011991; IPR018122; PTHR11829 (PANTHER), SSF46785 (SUPERFAMILY)
GB10569	homeobox protein b-h1	536	F:sequence-specific DNA binding transcription factor activity; F:sequence-specific DNA binding; C:nucleus; P:regulation of transcription, DNA-dependent	IPR001356; IPR009057; IPR017970; IPR020479; PTHR24330 (PANTHER), PTHR24330:SF3 (PANTHER)
GB10585	enhancer of split mbeta	171	F:DNA binding; C:nucleus; P:regulation of transcription, DNA-dependent; F:protein dimerization activity	IPR003650; IPR011598; PTHR10985 (PANTHER), PTHR10985:SF12 (PANTHER)
GB10613	homeobox protein chox-	155	F:sequence-specific DNA binding transcription factor activity; F:transcription regulatory region sequence-specific DNA binding; C:nucleus; P:regulation of transcription, DNA-dependent	IPR000047; IPR001356; IPR009057; IPR017970; PTHR24336 (PANTHER), PTHR24336:SF0 (PANTHER)
GB10623	segmentation protein even-skipped	370	F:sequence-specific DNA binding transcription factor activity; F:transcription regulatory region sequence-specific DNA binding; C:nucleus; P:regulation of transcription, DNA-dependent	IPR001356; IPR009057; IPR017970; IPR020479; PTHR24329 (PANTHER), PTHR24329:SF152 (PANTHER)
GB10630	zinc finger protein 643-like	333	F:zinc ion binding; F:nucleic acid binding; C:intracellular	IPR001878; IPR007087; IPR013087; IPR015880; PTHR23228 (PANTHER), PTHR23228:SF42 (PANTHER), SSF57667 (SUPERFAMILY)
GB10633	longitudinals lacking	127	P:regulation of transcription from RNA polymerase II promoter; P:salivary gland morphogenesis; P:tracheal outgrowth, open tracheal system; P:chromatin silencing; F:sequence-specific DNA binding transcription factor activity; C:nucleus; F:protein binding	IPR000210; IPR011333; IPR013069; PTHR23110 (PANTHER), PTHR23110:SF58 (PANTHER)
GB10650	probable nuclear hormone receptor hr3-like	494	P:transcription, DNA-dependent; F:steroid hormone receptor activity; C:nucleus; P:steroid hormone mediated signaling pathway; F:zinc ion binding; F:sequence-specific DNA binding; F:thyroid hormone receptor activity	IPR000536; IPR001628; IPR001723; IPR001728; IPR008946; IPR013088; PTHR24082 (PANTHER), PTHR24082:SF4 (PANTHER), SSF57716 (SUPERFAMILY)
GB10656	zinc finger protein 642-like isoform 2	492	F:zinc ion binding; F:nucleic acid binding; C:intracellular	IPR007087; IPR013087; IPR015880; PTHR24387 (PANTHER), PTHR24387:SF0 (PANTHER), PF13465 (PFAM), SSF57667 (SUPERFAMILY)
GB10685	protein cbfa2t2	874	F:zinc ion binding; F:sequence-specific DNA binding transcription factor activity	IPR002893; IPR003894; IPR013289; IPR014896; IPR019371; PTHR13511 (PANTHER), PTHR13511:SF0 (PANTHER), SSF144232 (SUPERFAMILY)
GB10712	myelin transcription factor 1-like protein	1502	F:sequence-specific DNA binding transcription factor activity; C:nucleus; F:zinc ion binding; P:regulation of transcription, DNA-dependent	IPR002515; PTHR10816 (PANTHER), PTHR10816:SF6 (PANTHER), SSF103637 (SUPERFAMILY)
GB10725	forkhead box protein n1	607	F:sequence-specific DNA binding transcription factor activity; F:sequence-specific DNA binding; C:nucleus; P:regulation of transcription, DNA-dependent	IPR001766; IPR011991; IPR018122; PTHR11829 (PANTHER), SSF46785 (SUPERFAMILY)
GB10751	protein alpha isoform	765	F:zinc ion binding; C:intracellular; F:DNA binding; F:protein binding	IPR000210; IPR007087; IPR011333; IPR013069; IPR013087; IPR015880; IPR017956; PTHR23110 (PANTHER), PTHR23110:SF53 (PANTHER), PF13894 (PFAM), SSF57667 (SUPERFAMILY)
GB10752	homeobox protein six4	401	F:sequence-specific DNA binding transcription factor activity; F:sequence-specific DNA binding; C:nucleus; P:regulation of transcription, DNA-dependent	IPR001356; IPR009057; IPR017970; PTHR10390 (PANTHER), PTHR10390:SF16 (PANTHER)
GB10759	ecdysteroid-regulated gene e74	555	F:sequence-specific DNA binding transcription factor activity; F:sequence-specific DNA binding; C:nucleus; P:regulation of transcription, DNA-dependent	IPR000418; IPR011991; PTHR11849 (PANTHER), PTHR11849:SF74 (PANTHER), SSF46785 (SUPERFAMILY)
GB10772	paired box protein pax-1-like	400	F:DNA binding; P:multicellular organismal development; C:nucleus; P:regulation of transcription, DNA-dependent	IPR001523; IPR009057; IPR011991; PTHR24329 (PANTHER), PTHR24329:SF0 (PANTHER)
GB10773	transcription factor capicua	1927	F:protein binding	IPR009071; PTHR22181 (PANTHER)
GB10785	zinc finger protein 45-like	619	F:nucleic acid binding; C:nucleus; F:zinc ion binding	IPR007087; IPR013087; IPR015880; PTHR24377 (PANTHER), PTHR24377:SF0 (PANTHER), PF13465 (PFAM), SSF57667 (SUPERFAMILY)
GB10821	homeotic protein caudal	358	F:metal ion binding; P:regulation of transcription, DNA-dependent; F:hydrolase activity, acting on carbon-nitrogen (but not peptide) bonds, in cyclic amides; P:glutamine catabolic process; F:ATP binding; F:aspartate carbamoyltransferase activity; F:sequence-specific DNA binding transcription factor activity; P:'de novo' pyrimidine nucleobase biosynthetic process; F:amino acid binding; F:transcrip…	IPR000047; IPR001356; IPR009057; IPR017970; IPR020479; PTHR24332 (PANTHER), PTHR24332:SF0 (PANTHER)
GB10829	zinc finger protein 846-like	665	F:nucleic acid binding; C:nucleus; F:zinc ion binding	IPR007087; IPR013087; IPR015880; PTHR24375 (PANTHER), PTHR24375:SF0 (PANTHER), PF13465 (PFAM), PF13894 (PFAM), SSF57667 (SUPERFAMILY)
GB10878	protein class 2 isoform	701	F:sequence-specific DNA binding transcription factor activity; P:regulation of transcription, DNA-dependent	IPR000580
GB10884	zinc finger protein	620	F:nucleic acid binding; C:nucleus; F:zinc ion binding	IPR007087; IPR013087; IPR015880; PTHR24386 (PANTHER), PTHR24386:SF5 (PANTHER), PF13465 (PFAM), PF13894 (PFAM), PF13912 (PFAM), SSF57667 (SUPERFAMILY)
GB10960	leucine-zipper-like transcriptional regulator 1-like	765	F:protein binding	IPR000210; IPR006652; IPR011333; IPR013069; IPR015915; PTHR23244 (PANTHER), PTHR23244:SF15 (PANTHER), PF13415 (PFAM), PF13418 (PFAM), PF13854 (PFAM), SSF117281 (SUPERFAMILY)
GB10979	n6-adenosine-methyltransferase 70 kda subunit-like	556	P:RNA methylation; F:mRNA (2'-O-methyladenosine-N6-)-methyltransferase activity; C:nucleus	IPR007757; IPR025848; G3DSA:3.40.50.150 (GENE3D), PTHR12829 (PANTHER), PTHR12829:SF0 (PANTHER), SSF53335 (SUPERFAMILY)
GB11019	importin-4-like	1575	P:intracellular protein transport; F:protein transporter activity; F:protein binding; C:nuclear pore; F:sequence-specific DNA binding transcription factor activity; F:sequence-specific DNA binding	IPR000357; IPR001494; IPR001766; IPR011989; IPR011991; IPR016024; IPR018122; IPR021133; PTHR10527 (PANTHER), PTHR10527:SF6 (PANTHER), SSF46785 (SUPERFAMILY)
GB11045	histone acetyltransferase tip60-like	453	F:transferase activity, transferring acyl groups other than amino-acyl groups; C:nucleus; P:regulation of transcription, DNA-dependent	IPR000953; IPR002717; IPR016181; IPR016197; IPR025995; G3DSA:2.30.30.270 (GENE3D), PTHR10615 (PANTHER), PTHR10615:SF30 (PANTHER)
GB11083	homeobox protein prophet of pit-1	175	F:sequence-specific DNA binding transcription factor activity; F:sequence-specific DNA binding; C:nucleus; P:regulation of transcription, DNA-dependent	IPR001356; IPR009057; IPR017970; PTHR24329 (PANTHER), PTHR24329:SF62 (PANTHER)
GB11098	homeobox protein hox-b3-like	631	F:sequence-specific DNA binding transcription factor activity; F:sequence-specific DNA binding; C:nucleus; P:regulation of transcription, DNA-dependent	IPR001356; IPR009057; IPR017970; IPR020479; PTHR24335 (PANTHER), PTHR24335:SF0 (PANTHER)
GB11125	estrogen-related receptor	435	P:steroid hormone mediated signaling pathway; F:zinc ion binding; P:regulation of transcription, DNA-dependent; F:sequence-specific DNA binding; F:sequence-specific DNA binding transcription factor activity; F:steroid hormone receptor activity; C:nucleus	IPR000536; IPR001628; IPR001723; IPR008946; IPR013088; PTHR24084 (PANTHER), PTHR24084:SF0 (PANTHER), SSF57716 (SUPERFAMILY)
GB11254	empty spiracles	448	F:sequence-specific DNA binding transcription factor activity; F:transcription regulatory region sequence-specific DNA binding; C:nucleus; P:regulation of transcription, DNA-dependent	IPR001356; IPR009057; IPR017970; IPR020479; PTHR24339 (PANTHER), PTHR24339:SF0 (PANTHER)
GB11295	zinc finger	669	F:nucleic acid binding; C:nucleus; F:zinc ion binding	IPR007087; IPR012934; IPR013087; IPR015880; PTHR24375 (PANTHER), PTHR24375:SF0 (PANTHER), PF13465 (PFAM), PF13912 (PFAM), SSF57667 (SUPERFAMILY), SSF57716 (SUPERFAMILY)
GB11309	aryl hydrocarbon receptor nuclear translocator-like protein 1-like	739	F:signal transducer activity; P:regulation of transcription, DNA-dependent; C:transcription factor complex; F:receptor activity; F:DNA binding; F:sequence-specific DNA binding transcription factor activity; P:signal transduction; C:cytoplasm; F:protein dimerization activity	IPR000014; IPR001067; IPR001610; IPR011598; IPR013655; IPR013767; G3DSA:3.30.450.20 (GENE3D), PTHR23042 (PANTHER), PTHR23042:SF10 (PANTHER), SSF55785 (SUPERFAMILY)
GB11330	tumor protein p73-like	344	F:sequence-specific DNA binding transcription factor activity; F:transcription regulatory region DNA binding; C:nucleus; P:apoptotic process; P:regulation of transcription, DNA-dependent	IPR002117; IPR008967; IPR011615; IPR012346
GB11331	transcriptional activator cubitus interruptus-like	1290	F:zinc ion binding; F:nucleic acid binding; C:intracellular	IPR007087; IPR013087; IPR015880; PTHR19818 (PANTHER), PTHR19818:SF7 (PANTHER), PF13465 (PFAM), SSF57667 (SUPERFAMILY)
GB11337	transcription initiation factor tfiid subunit 1	2727	P:translational initiation; F:translation initiation factor activity; F:protein binding; F:zinc ion binding; C:intracellular	IPR000210; IPR001487; IPR007087; IPR011333; IPR013069; IPR013087; IPR015880; IPR018359; IPR022591; PTHR13900 (PANTHER), PTHR13900:SF0 (PANTHER), SSF57667 (SUPERFAMILY)
GB11341	homeobox protein aristaless-like	280	F:sequence-specific DNA binding transcription factor activity; P:regulation of transcription, DNA-dependent; F:transcription regulatory region sequence-specific DNA binding; C:nucleus	IPR000047; IPR001356; IPR003654; IPR009057; IPR017970; PTHR24329 (PANTHER), PTHR24329:SF87 (PANTHER)
GB11357	zinc finger protein 629	1217	F:nucleic acid binding; C:nucleus; F:zinc ion binding	IPR007087; IPR012934; IPR013087; IPR015880; PTHR24375 (PANTHER), PTHR24375:SF0 (PANTHER), PF13465 (PFAM), PF13894 (PFAM), SSF57667 (SUPERFAMILY), SSF57716 (SUPERFAMILY)
GB11364	ecdysone-induced protein 75	878	P:steroid hormone mediated signaling pathway; F:zinc ion binding; P:regulation of transcription, DNA-dependent; F:thyroid hormone receptor activity; F:sequence-specific DNA binding; F:steroid hormone receptor activity; C:nucleus	IPR000536; IPR001628; IPR001723; IPR001728; IPR008946; IPR013088; PTHR24082 (PANTHER), PTHR24082:SF30 (PANTHER), SSF57716 (SUPERFAMILY)
GB11398	protein dr1-like	167	C:nucleus; F:sequence-specific DNA binding; F:protein heterodimerization activity	IPR003958; IPR009072; PTHR11064 (PANTHER), PTHR11064:SF8 (PANTHER)
GB11400	protein bric-a-brac 2	752	F:DNA binding; F:protein binding	IPR000210; IPR003656; IPR007588; IPR011333; IPR013069; PTHR23110 (PANTHER), SSF57667 (SUPERFAMILY)
GB11411	suppressor of hairless	497	F:RNA polymerase II core promoter proximal region sequence-specific DNA binding; F:RNA polymerase II core promoter proximal region sequence-specific DNA binding transcription factor activity; C:nucleus; P:regulation of transcription, DNA-dependent; F:protein binding	IPR002909; IPR008967; IPR013783; IPR014756; IPR015350; IPR015351; G3DSA:2.80.10.50 (GENE3D), PTHR10665 (PANTHER)
GB11417	single-minded-like protein 1	829	P:transcription, DNA-dependent; C:nucleus; F:signal transducer activity; P:signal transduction; F:protein dimerization activity	IPR000014; IPR001610; IPR011598; IPR013655; IPR013767; G3DSA:3.30.450.20 (GENE3D), PTHR23043 (PANTHER), PTHR23043:SF3 (PANTHER), SSF55785 (SUPERFAMILY)
GB11420	protein bric-a-brac 2	898	F:nucleic acid binding; C:nucleus; F:zinc ion binding; F:protein binding	IPR000210; IPR007087; IPR011333; IPR011989; IPR013069; IPR013087; IPR015880; PTHR24390 (PANTHER), PTHR24390:SF9 (PANTHER), PF13465 (PFAM), PF13894 (PFAM), SSF57667 (SUPERFAMILY)
GB11441	homeobox protein araucan	558	F:sequence-specific DNA binding transcription factor activity; F:sequence-specific DNA binding; C:nucleus; P:regulation of transcription, DNA-dependent	IPR001356; IPR003893; IPR008422; IPR009057; IPR017970; PTHR11211 (PANTHER), PTHR11211:SF2 (PANTHER)
GB11457	fork head domain-containing protein fd2	264	F:sequence-specific DNA binding transcription factor activity; F:sequence-specific DNA binding; C:nucleus; P:regulation of transcription, DNA-dependent	IPR001766; IPR011991; IPR018122; PTHR11829 (PANTHER), SSF46785 (SUPERFAMILY)
GB11475	homeodomain transcription factor-like	278	F:DNA binding	IPR021980; PTHR12680 (PANTHER), PTHR12680:SF1 (PANTHER)
GB11491	homeobox protein not2	420	F:sequence-specific DNA binding transcription factor activity; F:sequence-specific DNA binding; C:nucleus; P:regulation of transcription, DNA-dependent	IPR001356; IPR009057; IPR017970; PTHR24337 (PANTHER), PTHR24337:SF8 (PANTHER)
GB11524	homeotic protein ultrabithorax-like	101	F:sequence-specific DNA binding transcription factor activity; F:sequence-specific DNA binding; P:multicellular organismal development; C:nucleus; P:regulation of transcription, DNA-dependent	IPR001356; IPR009057; IPR017970; IPR020479; PTHR24326 (PANTHER), PTHR24326:SF0 (PANTHER)
GB11536	homeobox protein aristaless-like 4-like	353	F:sequence-specific DNA binding transcription factor activity; F:sequence-specific DNA binding; C:nucleus; P:regulation of transcription, DNA-dependent	IPR001356; IPR009057; IPR017970; PTHR25947 (PANTHER), PTHR25947:SF9 (PANTHER)
GB11558	mkl myocardin-like protein 1	1211	F:nucleic acid binding	IPR003034; IPR004018; PTHR22793 (PANTHER), PTHR22793:SF3 (PANTHER), SSF68906 (SUPERFAMILY)
GB11566	homeobox protein otx1	335	F:sequence-specific DNA binding transcription factor activity; F:sequence-specific DNA binding; C:nucleus; P:regulation of transcription, DNA-dependent	IPR001356; IPR009057; IPR017970; PTHR24329 (PANTHER), PTHR24329:SF128 (PANTHER)
GB11570	transcription factor sox-21	387	F:protein binding	IPR009071; PTHR10270 (PANTHER)
GB11571	homeobox protein dbx1-b	541	F:sequence-specific DNA binding transcription factor activity; C:nucleus; P:regulation of transcription, DNA-dependent; F:transcription regulatory region sequence-specific DNA binding	IPR000047; IPR001356; IPR009057; IPR017970; IPR020479; PTHR24331 (PANTHER), PTHR24331:SF0 (PANTHER)
GB11582	protein mothers against dpp	468	F:sequence-specific DNA binding transcription factor activity; C:transcription factor complex; P:regulation of transcription, DNA-dependent; P:transforming growth factor beta receptor signaling pathway; F:protein binding	IPR001132; IPR003619; IPR008984; IPR013019; IPR013790; IPR017855; PTHR13703:SF19 (PANTHER)
GB11585	cyclic amp-responsive element-binding protein 1-like isoform 2	305	F:sequence-specific DNA binding transcription factor activity; F:sequence-specific DNA binding; F:protein dimerization activity; F:calcium ion binding; C:nucleus; F:calcium-dependent phospholipid binding; P:regulation of transcription, DNA-dependent	IPR001630; IPR003102; IPR004827; G3DSA:1.20.5.170 (GENE3D), PTHR22952 (PANTHER), PTHR22952:SF16 (PANTHER)
GB11591	zinc finger protein 76-like	504	F:zinc ion binding; F:nucleic acid binding; C:intracellular	IPR007087; IPR013087; IPR015880; PTHR11389 (PANTHER), PTHR11389:SF362 (PANTHER), PF13465 (PFAM), SSF57667 (SUPERFAMILY)
GB11634	nuclear hormone receptor ftz-f1 beta	947	P:steroid hormone mediated signaling pathway; F:zinc ion binding; P:regulation of transcription, DNA-dependent; F:sequence-specific DNA binding; F:sequence-specific DNA binding transcription factor activity; F:steroid hormone receptor activity; C:nucleus	IPR000536; IPR001628; IPR001723; IPR008946; IPR013088; PTHR24086 (PANTHER), PTHR24086:SF0 (PANTHER), SSF57716 (SUPERFAMILY)
GB11635	zinc finger protein 236-like	414	F:zinc ion binding; F:nucleic acid binding; C:intracellular	IPR007087; IPR013087; IPR015880; PTHR24396 (PANTHER), PTHR24396:SF0 (PANTHER), PF13465 (PFAM), PF13894 (PFAM), SSF57667 (SUPERFAMILY)
GB11654	segmentation protein runt	336	F:sequence-specific DNA binding transcription factor activity; F:DNA binding; F:ATP binding; C:nucleus; P:regulation of transcription, DNA-dependent	IPR000040; IPR008967; IPR012346; IPR013524; PTHR11950:SF4 (PANTHER)
GB11661	zinc finger protein	867	F:zinc ion binding; F:nucleic acid binding; C:intracellular	IPR007087; IPR013087; IPR015880; PTHR24387 (PANTHER), PTHR24387:SF61 (PANTHER), PF13465 (PFAM), SSF57667 (SUPERFAMILY)
GB11691	upf0474 protein cg13624	513	F:sequence-specific DNA binding transcription factor activity; F:sequence-specific DNA binding; F:protein dimerization activity; P:regulation of transcription, DNA-dependent	IPR004827; G3DSA:1.20.5.170 (GENE3D), PTHR21552 (PANTHER)
GB11694	homeobox protein invected	597	F:sequence-specific DNA binding transcription factor activity; P:multicellular organismal development; F:transcription regulatory region sequence-specific DNA binding; C:nucleus; P:regulation of transcription, DNA-dependent	IPR000047; IPR000747; IPR001356; IPR009057; IPR017970; IPR019549; IPR019737; IPR020479; PTHR24341 (PANTHER), PTHR24341:SF0 (PANTHER)
GB11714	paired box protein pax-6	527	F:sequence-specific DNA binding transcription factor activity; F:sequence-specific DNA binding; P:multicellular organismal development; C:nucleus; P:regulation of transcription, DNA-dependent	IPR001356; IPR001523; IPR009057; IPR011991; PTHR24329 (PANTHER), PTHR24329:SF17 (PANTHER)
GB11734	deformed epidermal autoregulatory factor 1-like	473	F:zinc ion binding; F:DNA binding	IPR000770; IPR002893; IPR010919; IPR024119; PTHR10237:SF0 (PANTHER), SSF144232 (SUPERFAMILY)
GB11750	pr domain zinc finger protein 1	959	F:zinc ion binding; F:nucleic acid binding; C:intracellular; F:protein binding	IPR001214; IPR007087; IPR013087; IPR015880; G3DSA:2.170.270.10 (GENE3D), PTHR11389 (PANTHER), PTHR11389:SF339 (PANTHER), PF13465 (PFAM), SSF57667 (SUPERFAMILY), SSF82199 (SUPERFAMILY)
GB11753	proto-oncogene c-fos-like	269	F:sequence-specific DNA binding transcription factor activity; F:sequence-specific DNA binding; F:protein dimerization activity; C:nucleus; P:regulation of transcription, DNA-dependent	IPR000837; IPR004827; G3DSA:1.20.5.170 (GENE3D), PTHR23351 (PANTHER), PTHR23351:SF8 (PANTHER)
GB11761	endothelial transcription factor gata-	426	P:thymic T cell selection; F:RNA polymerase II core promoter sequence-specific DNA binding; P:mast cell differentiation; P:uterus development; P:positive regulation of transcription regulatory region DNA binding; P:canonical Wnt receptor signaling pathway involved in metanephric kidney development; P:regulation of histone H3-K4 methylation; P:parathyroid hormone secretion; P:in utero embryonic de…	IPR000679; IPR013088; PTHR10071 (PANTHER), PTHR10071:SF116 (PANTHER), SSF57716 (SUPERFAMILY)
GB11793	fork head domain-containing protein fd4	365	F:sequence-specific DNA binding transcription factor activity; F:sequence-specific DNA binding; C:nucleus; P:regulation of transcription, DNA-dependent	IPR001766; IPR011991; IPR018122; PTHR11829 (PANTHER), SSF46785 (SUPERFAMILY)
GB11844	zinc finger protein 398-like	462	F:zinc ion binding; F:nucleic acid binding; C:intracellular	IPR007087; IPR013087; IPR015880; PTHR23228 (PANTHER), PTHR23228:SF42 (PANTHER), PF13465 (PFAM), SSF57667 (SUPERFAMILY)
GB11845	zinc finger protein 192-like	496	F:zinc ion binding; F:nucleic acid binding; C:intracellular	IPR007087; IPR013087; IPR015880; PTHR10032 (PANTHER), PTHR10032:SF111 (PANTHER), PF13465 (PFAM), PF13894 (PFAM), SSF57667 (SUPERFAMILY)
GB11880	zinc finger protein 729-like	728	F:nucleic acid binding; C:nucleus; F:zinc ion binding	IPR007087; IPR012934; IPR013087; IPR015880; PTHR24384 (PANTHER), PTHR24384:SF0 (PANTHER), PF13465 (PFAM), PF13894 (PFAM), SSF57667 (SUPERFAMILY), SSF57716 (SUPERFAMILY)
GB11900	nuclear factor interleukin-3-regulated protein	455	F:sequence-specific DNA binding transcription factor activity; F:sequence-specific DNA binding; F:protein dimerization activity; P:regulation of transcription, DNA-dependent	IPR004827; G3DSA:1.20.5.170 (GENE3D), PTHR15284 (PANTHER), PTHR15284:SF0 (PANTHER)
GB11901	aryl hydrocarbon receptor	879	F:receptor activity; F:signal transducer activity; F:DNA binding; P:signal transduction; C:nucleus; P:regulation of transcription, DNA-dependent; F:acetyl-CoA carboxylase activity; F:protein dimerization activity	IPR000014; IPR001610; IPR011598; IPR013655; IPR013767; G3DSA:3.30.450.20 (GENE3D), PTHR10649 (PANTHER), PTHR10649:SF6 (PANTHER), SSF55785 (SUPERFAMILY)
GB11909	zinc finger protein 813-like	328	F:zinc ion binding; F:nucleic acid binding; C:intracellular	IPR007087; IPR013087; IPR015880; PTHR11389 (PANTHER), PF13465 (PFAM), PF13894 (PFAM), SSF57667 (SUPERFAMILY)
GB11924	transcriptional repressor protein yy1-like isoform 2	356	F:zinc ion binding; F:nucleic acid binding; C:intracellular	IPR007087; IPR013087; IPR015880; IPR017114; PTHR14003 (PANTHER), PF13465 (PFAM), PF13894 (PFAM), SSF57667 (SUPERFAMILY)
GB11938	zinc finger protein 836-like	678	F:zinc ion binding; F:nucleic acid binding; C:intracellular	IPR007087; IPR013087; IPR015880; PTHR23228 (PANTHER), PTHR23228:SF14 (PANTHER), PF13465 (PFAM), SSF57667 (SUPERFAMILY)
GB11980	u5 small nuclear ribonucleoprotein 40 kda	351	F:nucleic acid binding; C:ribonucleoprotein complex; F:protein binding	IPR001680; IPR015943; IPR017986; IPR019775; IPR020472; PTHR22847 (PANTHER), PTHR22847:SF47 (PANTHER)
GB11981	segmentation protein cap n collar-like	852	F:sequence-specific DNA binding transcription factor activity; F:sequence-specific DNA binding; F:protein dimerization activity; C:nucleus; P:regulation of transcription, DNA-dependent	IPR004827; IPR008917; PTHR24414 (PANTHER), PTHR24414:SF8 (PANTHER)
GB11988	homeotic protein proboscipedia	783	F:sequence-specific DNA binding transcription factor activity; F:sequence-specific DNA binding; P:multicellular organismal development; C:nucleus; P:regulation of transcription, DNA-dependent	IPR001356; IPR001827; IPR009057; IPR017970; IPR020479; PTHR24326 (PANTHER), PTHR24326:SF32 (PANTHER)
GB11989	PREDICTED: hypothetical protein LOC725023 isoform 1	540	C:nucleus; F:DNA binding; P:transcription, DNA-dependent	IPR017923; PTHR15201 (PANTHER)
GB11995	phd finger protein 12-like	638	F:zinc ion binding; F:protein binding	IPR000253; IPR001965; IPR008984; IPR011011; IPR013083; IPR019786; IPR019787; PTHR24102 (PANTHER), PTHR24102:SF5 (PANTHER)
GB11997	tata-box-binding protein	105	F:DNA binding; P:transcription initiation from RNA polymerase II promoter; P:regulation of transcription, DNA-dependent	IPR000814; IPR012295; PTHR10126:SF6 (PANTHER), SSF55945 (SUPERFAMILY)
GB12001	protein alpha isoform	573	F:protein binding; F:zinc ion binding; F:nucleic acid binding; C:intracellular	IPR000210; IPR007087; IPR011333; IPR013069; IPR013087; IPR015880; PTHR23110 (PANTHER), PTHR23110:SF13 (PANTHER), PF13894 (PFAM), SSF57667 (SUPERFAMILY)
GB12003	serendipity locus protein h-1	204	F:nucleic acid binding; C:nucleus; F:zinc ion binding	IPR007087; IPR013087; IPR015880; PTHR11389 (PANTHER), PTHR11389:SF381 (PANTHER), PF13465 (PFAM), PF13894 (PFAM), SSF57667 (SUPERFAMILY)
GB12004	transcription factor ap-1-like	264	F:sequence-specific DNA binding transcription factor activity; F:sequence-specific DNA binding; F:protein dimerization activity; C:nucleus; P:regulation of transcription, DNA-dependent	IPR002112; IPR004827; IPR005643; IPR008917; G3DSA:1.20.5.170 (GENE3D), PTHR11462 (PANTHER)
GB12021	pr domain zinc finger protein 10-like isoform 1	945	F:zinc ion binding; F:nucleic acid binding; C:intracellular; F:protein binding	IPR001214; IPR007087; IPR013087; IPR015880; G3DSA:2.170.270.10 (GENE3D), PTHR24403 (PANTHER), PTHR24403:SF1 (PANTHER), PF13465 (PFAM), PF13894 (PFAM), SSF57667 (SUPERFAMILY)
GB12040	doublesex- and mab-3-related transcription factor a2	236	F:sequence-specific DNA binding; P:sex differentiation; C:nucleus; P:regulation of transcription, DNA-dependent	IPR001275; IPR026607; PTHR12322:SF14 (PANTHER)
GB12055	nf-x1-type zinc finger protein nfxl1	828	F:sequence-specific DNA binding transcription factor activity; C:nucleus; F:zinc ion binding; P:regulation of transcription, DNA-dependent; F:protein binding	IPR000967; IPR019786; IPR019787; PTHR12360 (PANTHER), PTHR12360:SF1 (PANTHER), SSF57850 (SUPERFAMILY)
GB12076	protein deadpan	446	F:DNA binding; C:nucleus; P:regulation of transcription, DNA-dependent; F:protein dimerization activity	IPR003650; IPR011598; IPR018352; PTHR10985 (PANTHER), PTHR10985:SF17 (PANTHER)
GB12094	longitudinals lacking isoforms a b d l	441	F:DNA binding; F:protein binding; F:zinc ion binding	IPR000210; IPR007087; IPR011333; IPR013069; PTHR23110 (PANTHER), PTHR23110:SF9 (PANTHER)
GB12109	transcriptional repressor ctcfl-like	907	F:zinc ion binding; F:nucleic acid binding; C:intracellular	IPR007087; IPR013087; IPR015880; PTHR24375 (PANTHER), PTHR24375:SF1 (PANTHER), PF13465 (PFAM), SSF57667 (SUPERFAMILY)
GB12126	ceramide synthase 6-like	125	F:sequence-specific DNA binding transcription factor activity; F:sequence-specific DNA binding; C:integral to membrane; P:regulation of transcription, DNA-dependent	IPR006634; PTHR12560 (PANTHER), PTHR12560:SF0 (PANTHER)
GB12139	phd finger protein rhinoceros	2601	F:zinc ion binding; F:protein binding	IPR001965; IPR011011; IPR013083; IPR019542; IPR019786; IPR019787; PTHR13793 (PANTHER), PTHR13793:SF24 (PANTHER), PF13831 (PFAM), PF13832 (PFAM)
GB12157	paired mesoderm homeobox protein 2b	319	F:sequence-specific DNA binding transcription factor activity; F:sequence-specific DNA binding; C:nucleus; P:regulation of transcription, DNA-dependent	IPR001356; IPR009057; IPR017970; PTHR24329 (PANTHER), PTHR24329:SF63 (PANTHER)
GB12171	zinc finger protein 236	1174	F:zinc ion binding; F:nucleic acid binding; C:intracellular	IPR007087; IPR013087; IPR015880; PTHR24402 (PANTHER), PF13465 (PFAM), SSF57667 (SUPERFAMILY)
GB12212	transcription factor kayak	300	F:sequence-specific DNA binding transcription factor activity; F:sequence-specific DNA binding; F:protein dimerization activity; C:nucleus; P:regulation of transcription, DNA-dependent	IPR000837; IPR004827; G3DSA:1.20.5.170 (GENE3D), PTHR23351 (PANTHER), PTHR23351:SF2 (PANTHER)
GB12301	t-box transcription factor tbx1-like	416	F:sequence-specific DNA binding transcription factor activity; F:DNA binding; C:nucleus; P:regulation of transcription, DNA-dependent	IPR001699; IPR008967; IPR018186; PTHR11267:SF27 (PANTHER)
GB12305	transcription initiation factor tfiid subunit 11	243	P:translational initiation; F:DNA binding; P:transcription initiation from RNA polymerase II promoter; F:translation initiation factor activity; C:nucleus; F:protein heterodimerization activity	IPR006809; IPR009072; PTHR13218:SF6 (PANTHER)
GB12313	PREDICTED: uncharacterized protein LOC100872255	554	F:zinc ion binding; F:nucleic acid binding; C:intracellular	IPR007087; IPR013087; IPR015880; PTHR11389 (PANTHER), PTHR11389:SF336 (PANTHER), PF12874 (PFAM), PF13465 (PFAM), PF13912 (PFAM), SSF57667 (SUPERFAMILY)
GB12355	paired box protein pax-6-like	402	P:transcription, DNA-dependent; F:sequence-specific DNA binding transcription factor activity; F:sequence-specific DNA binding; C:nucleus	IPR001356; IPR001523; IPR009057; IPR011991; IPR017970; PTHR24329 (PANTHER), PTHR24329:SF17 (PANTHER)
GB12408	lim homeobox protein lhx5-like	493	F:sequence-specific DNA binding transcription factor activity; F:sequence-specific DNA binding; F:transferase activity; C:nucleus; F:zinc ion binding; P:regulation of transcription, DNA-dependent	IPR001356; IPR001781; IPR009057; IPR017970; PTHR24208 (PANTHER), PTHR24208:SF38 (PANTHER), SSF57716 (SUPERFAMILY)
GB12455	dna-binding protein ets97d-like	725	F:sequence-specific DNA binding transcription factor activity; F:sequence-specific DNA binding; C:nucleus; P:regulation of transcription, DNA-dependent; F:protein binding	IPR000418; IPR002110; IPR003118; IPR011991; IPR013761; IPR020683; IPR024668; PTHR11849 (PANTHER), PTHR11849:SF28 (PANTHER), SSF46785 (SUPERFAMILY)
GB12465	insulin gene enhancer protein isl-1-like	418	F:sequence-specific DNA binding transcription factor activity; F:sequence-specific DNA binding; C:nucleus; F:zinc ion binding; P:regulation of transcription, DNA-dependent	IPR001356; IPR001781; IPR009057; IPR017970; PTHR24204 (PANTHER), PTHR24204:SF0 (PANTHER), SSF57716 (SUPERFAMILY)
GB12472	zinc finger protein 28-like	770	F:nucleic acid binding; C:nucleus; F:zinc ion binding	IPR007087; IPR012934; IPR013087; IPR015880; PTHR24375 (PANTHER), PTHR24375:SF0 (PANTHER), PF13465 (PFAM), PF13894 (PFAM), SSF57667 (SUPERFAMILY), SSF57716 (SUPERFAMILY)
GB12480	zinc finger protein zic 4-like	418	F:zinc ion binding; F:nucleic acid binding; C:intracellular	IPR007087; IPR013087; IPR015880; PTHR19818 (PANTHER), PTHR19818:SF21 (PANTHER), PF13465 (PFAM), SSF57667 (SUPERFAMILY)
GB12498	myb protein	758	F:DNA binding; F:chromatin binding	IPR001005; IPR009057; IPR015395; IPR017930; PTHR10641 (PANTHER), PTHR10641:SF166 (PANTHER), PF13921 (PFAM)
GB12518	protein odd-skipped-like	292	F:zinc ion binding; F:nucleic acid binding; C:intracellular	IPR007087; IPR013087; IPR015880; PTHR14196 (PANTHER), PTHR14196:SF0 (PANTHER), PF13465 (PFAM), SSF57667 (SUPERFAMILY)
GB12533	forkhead box protein n3	320	F:sequence-specific DNA binding transcription factor activity; F:sequence-specific DNA binding; C:nucleus; P:regulation of transcription, DNA-dependent	IPR001766; IPR011991; IPR018122; PTHR11829 (PANTHER), SSF46785 (SUPERFAMILY)
GB12566	af4 fmr2 family member 3	1132	F:DNA binding	IPR007797; PTHR10528:SF11 (PANTHER)
GB12583	zinc finger protein 76-like	612	F:zinc ion binding; F:nucleic acid binding; C:intracellular	IPR007087; IPR013087; IPR015880; PTHR19818 (PANTHER), PTHR19818:SF11 (PANTHER), PF13465 (PFAM), PF13894 (PFAM), SSF57667 (SUPERFAMILY)
GB12588	fruitless isoform c	91	F:nucleic acid binding; C:nucleus; F:zinc ion binding	IPR007087; IPR013087; IPR015880; PF13894 (PFAM)
GB12672	ets translocation variant 1	431	F:sequence-specific DNA binding transcription factor activity; F:sequence-specific DNA binding; C:nucleus; P:regulation of transcription, DNA-dependent	IPR000418; IPR011991; PTHR11849 (PANTHER), PTHR11849:SF26 (PANTHER), SSF46785 (SUPERFAMILY)
GB12684	nuclear transcription factor y subunit alpha-like	406	F:sequence-specific DNA binding transcription factor activity; F:DNA binding; C:CCAAT-binding factor complex; P:regulation of transcription, DNA-dependent	IPR001289; IPR018362
GB12724	immunodeficiency virus type i enhancer binding	142	F:zinc ion binding; F:nucleic acid binding; C:intracellular	IPR007087; IPR013087; IPR015880; PTHR13825 (PANTHER), PTHR13825:SF5 (PANTHER), SSF57667 (SUPERFAMILY)
GB12726	homeobox protein goosecoid isoform a-like	328	F:sequence-specific DNA binding transcription factor activity; F:sequence-specific DNA binding; C:nucleus; P:regulation of transcription, DNA-dependent	IPR001356; IPR009057; IPR017970; PTHR24329 (PANTHER), PTHR24329:SF122 (PANTHER)
GB12835	zinc finger protein 112-like protein	658	F:zinc ion binding; F:nucleic acid binding; C:intracellular	IPR007087; IPR013087; IPR015880; PTHR10032 (PANTHER), PTHR10032:SF135 (PANTHER), PF13465 (PFAM), PF13894 (PFAM), SSF57667 (SUPERFAMILY)
GB12845	phd finger protein 14-like	859	F:zinc ion binding; F:protein binding	IPR001841; IPR001965; IPR011011; IPR013083; IPR019786; IPR019787; PTHR13793 (PANTHER), PTHR13793:SF32 (PANTHER), PF13832 (PFAM)
GB12880	zinc finger protein	509	F:zinc ion binding; F:nucleic acid binding; C:intracellular	IPR007087; IPR013087; IPR015880; PTHR11389 (PANTHER), PTHR11389:SF372 (PANTHER), PF13465 (PFAM), SSF57667 (SUPERFAMILY)
GB12892	transcription factor sox-5	743	F:protein binding	IPR009071; PTHR10270 (PANTHER), PTHR10270:SF29 (PANTHER)
GB12947	low quality protein: transcription factor hamlet-like	1101	F:zinc ion binding; F:nucleic acid binding; C:intracellular; F:protein binding	IPR001214; IPR007087; IPR013087; IPR015880; G3DSA:2.170.270.10 (GENE3D), PTHR24393 (PANTHER), PTHR24393:SF0 (PANTHER), PF13465 (PFAM), PF13894 (PFAM), SSF57667 (SUPERFAMILY), SSF82199 (SUPERFAMILY)
GB12968	zinc finger protein	516	F:zinc ion binding; F:nucleic acid binding; C:intracellular	IPR007087; IPR013087; IPR015880; PTHR11389 (PANTHER), PTHR11389:SF337 (PANTHER), PF13465 (PFAM), PF13912 (PFAM), SSF57667 (SUPERFAMILY)
GB12972	fork head domain transcription factor slp1-like	427	F:sequence-specific DNA binding transcription factor activity; F:sequence-specific DNA binding; C:nucleus; P:regulation of transcription, DNA-dependent	IPR001766; IPR011991; IPR018122; PTHR11829 (PANTHER), SSF46785 (SUPERFAMILY)
GB13005	hairy enhancer-of-split related with yrpw motif protein 2	341	F:DNA binding; C:nucleus; P:regulation of transcription, DNA-dependent; F:protein dimerization activity	IPR003650; IPR011598; PTHR10985 (PANTHER), PTHR10985:SF37 (PANTHER)
GB13056	probable domain-containing histone demethylation protein 3b	1511	P:methylation; C:nucleus; F:DNA binding; F:zinc ion binding; F:methyltransferase activity; F:protein binding	IPR001965; IPR003347; IPR003349; IPR011011; IPR013083; PTHR10694 (PANTHER), PTHR10694:SF7 (PANTHER), PF13831 (PFAM), PF13832 (PFAM), SSF51197 (SUPERFAMILY), SSF63748 (SUPERFAMILY)
GB13163	homeobox protein gbx-2	217	F:sequence-specific DNA binding transcription factor activity; F:sequence-specific DNA binding; C:nucleus; P:regulation of transcription, DNA-dependent	IPR001356; IPR009057; IPR017970; IPR020479; PTHR24334 (PANTHER), PTHR24334:SF0 (PANTHER)
GB13176	protein max-like isoform 1	171	F:sequence-specific DNA binding transcription factor activity; C:nucleus; P:regulation of transcription, DNA-dependent; F:protein dimerization activity	IPR002418; IPR011598; PTHR10328 (PANTHER), PTHR10328:SF0 (PANTHER)
GB13179	organic cation transporter	685	P:transmembrane transport; C:integral to membrane; F:transmembrane transporter activity; F:zinc ion binding; F:nucleic acid binding; C:intracellular	IPR005828; IPR007087; IPR013087; IPR015880; IPR016196; IPR020846; G3DSA:1.20.1250.20 (GENE3D), PTHR24064 (PANTHER), PTHR24064:SF90 (PANTHER), PF13465 (PFAM), SSF57667 (SUPERFAMILY)
GB13203	myelin gene regulatory factor-like	1174	F:sequence-specific DNA binding transcription factor activity; F:DNA binding; P:regulation of transcription, DNA-dependent	IPR008967; IPR024061; IPR025719; IPR026932; IPR026933; PTHR13029 (PANTHER), PF13884 (PFAM)
GB13296	kelch repeat	290	F:zinc ion binding; F:nucleic acid binding; C:intracellular; F:protein binding	IPR006652; IPR015915; PTHR23244 (PANTHER), PF13415 (PFAM), PF13418 (PFAM), SSF117281 (SUPERFAMILY)
GB13352	forkhead box protein j1-b-like	283	F:sequence-specific DNA binding transcription factor activity; F:sequence-specific DNA binding; C:nucleus; P:regulation of transcription, DNA-dependent	IPR001766; IPR011991; IPR018122; PTHR11829 (PANTHER), SSF46785 (SUPERFAMILY)
GB13362	transcription factor tfiiib component b -like protein	655	F:chromatin binding; F:DNA binding	IPR001005; IPR009057; PTHR22929 (PANTHER), PTHR22929:SF0 (PANTHER)
GB13400	heat shock factor	692	F:sequence-specific DNA binding transcription factor activity; F:sequence-specific DNA binding; P:response to stress; C:nucleus; P:regulation of transcription, DNA-dependent	IPR000232; IPR010542; IPR011991; PTHR10015 (PANTHER), PTHR10015:SF11 (PANTHER), SSF46785 (SUPERFAMILY)
GB13407	histone acetyltransferase myst2	957	F:transferase activity, transferring acyl groups other than amino-acyl groups; F:sequence-specific DNA binding transcription factor activity; C:nucleus; F:zinc ion binding; P:regulation of transcription, DNA-dependent	IPR002515; IPR002717; IPR016181; G3DSA:3.30.60.60 (GENE3D), PTHR10615 (PANTHER), PTHR10615:SF28 (PANTHER), SSF103637 (SUPERFAMILY)
GB13409	homeotic protein deformed	451	F:sequence-specific DNA binding transcription factor activity; F:sequence-specific DNA binding; P:multicellular organismal development; C:nucleus; P:regulation of transcription, DNA-dependent	IPR001356; IPR001827; IPR009057; IPR017970; IPR017995; IPR020479; PTHR24326 (PANTHER), PTHR24326:SF0 (PANTHER)
GB13412	homeobox protein arx	304	F:sequence-specific DNA binding transcription factor activity; F:sequence-specific DNA binding; C:nucleus; P:regulation of transcription, DNA-dependent	IPR001356; IPR009057; IPR017970; PTHR24329 (PANTHER), PTHR24329:SF88 (PANTHER)
GB13447	tetratricopeptide repeat protein 35-b	1373	F:zinc ion binding; F:nucleic acid binding; C:intracellular	IPR007087; IPR013087; IPR015880; PTHR24383 (PANTHER), PTHR24383:SF6 (PANTHER), PF13465 (PFAM), PF13894 (PFAM), PF13912 (PFAM), SSF57667 (SUPERFAMILY)
GB13468	ecdysone-induced protein 78c	546	P:steroid hormone mediated signaling pathway; F:zinc ion binding; P:regulation of transcription, DNA-dependent; F:thyroid hormone receptor activity; F:sequence-specific DNA binding; F:steroid hormone receptor activity; C:nucleus	IPR000536; IPR001628; IPR001723; IPR001728; IPR008946; IPR013088; PTHR24082 (PANTHER), PTHR24082:SF30 (PANTHER), SSF57716 (SUPERFAMILY)
GB13477	t-box protein	539	F:sequence-specific DNA binding transcription factor activity; F:DNA binding; C:nucleus; P:regulation of transcription, DNA-dependent	IPR001699; IPR008967; PTHR11267:SF49 (PANTHER)
GB13491	sex combs reduced	380	F:sequence-specific DNA binding transcription factor activity; F:sequence-specific DNA binding; P:multicellular organismal development; C:nucleus; P:regulation of transcription, DNA-dependent	IPR001356; IPR009057; IPR017970; IPR017995; IPR020479; PTHR24326 (PANTHER), PTHR24326:SF0 (PANTHER)
GB13495	transcription factor dp-1	472	F:sequence-specific DNA binding transcription factor activity; F:DNA binding; C:transcription factor complex; P:regulation of transcription, DNA-dependent	IPR003316; IPR011991; IPR014889; IPR015648; IPR016556; PTHR12548:SF2 (PANTHER), SSF144074 (SUPERFAMILY), SSF46785 (SUPERFAMILY)
GB13498	homeobox protein nkx- -like	342	F:sequence-specific DNA binding transcription factor activity; F:sequence-specific DNA binding; C:nucleus; P:regulation of transcription, DNA-dependent	IPR001356; IPR009057; IPR017970; IPR020479; PTHR24340 (PANTHER), PTHR24340:SF8 (PANTHER)
GB13552	zinc finger protein xfin-like	1617	C:intracellular; F:zinc ion binding; F:nucleic acid binding	IPR007087; IPR013087; IPR015880; PTHR24402 (PANTHER), PF12874 (PFAM), PF13465 (PFAM), PF13894 (PFAM), PF13912 (PFAM), SSF57667 (SUPERFAMILY)
GB13572	transcription factor sum-1	346	P:muscle organ development; F:DNA binding; C:nucleus; P:regulation of transcription, DNA-dependent; F:protein dimerization activity	IPR002546; IPR011598; PTHR11534 (PANTHER)
GB13581	homeobox protein nkx- -like	390	F:sequence-specific DNA binding transcription factor activity; F:transcription regulatory region sequence-specific DNA binding; C:nucleus; P:regulation of transcription, DNA-dependent	IPR000047; IPR001356; IPR009057; IPR017970; IPR020479; PTHR24340 (PANTHER), PTHR24340:SF7 (PANTHER)
GB13662	homeobox protein pknox2-like	403	F:sequence-specific DNA binding transcription factor activity; F:sequence-specific DNA binding; C:nucleus; P:regulation of transcription, DNA-dependent	IPR001356; IPR008422; IPR009057; PTHR11850 (PANTHER), PTHR11850:SF7 (PANTHER)
GB13710	knirps-related protein	420	P:steroid hormone mediated signaling pathway; F:zinc ion binding; P:regulation of transcription, DNA-dependent; F:sequence-specific DNA binding; F:sequence-specific DNA binding transcription factor activity; F:steroid hormone receptor activity; C:nucleus	IPR001628; IPR008946; IPR013088; PTHR24079 (PANTHER), PTHR24079:SF4 (PANTHER), SSF57716 (SUPERFAMILY)
GB13738	transcription factor sox-15	745	F:protein binding	IPR009071; PTHR10270 (PANTHER), PTHR10270:SF147 (PANTHER)
GB13740	neuronal pas domain-containing protein 4	689	F:signal transducer activity; F:DNA binding; P:signal transduction; C:nucleus; P:regulation of transcription, DNA-dependent; F:protein dimerization activity	IPR000014; IPR001610; IPR011598; IPR013655; G3DSA:3.30.450.20 (GENE3D), PTHR23043 (PANTHER), PTHR23043:SF13 (PANTHER), SSF55785 (SUPERFAMILY)
GB13742	nuclear factor nf-kappa-b p110 subunit	79	F:sequence-specific DNA binding transcription factor activity; P:signal transduction; C:nucleus; P:regulation of transcription, DNA-dependent	IPR000451; IPR013783; IPR014756; PTHR24169 (PANTHER), PTHR24169:SF0 (PANTHER)
GB13745	#NAME?	229	F:sequence-specific DNA binding transcription factor activity; F:transcription regulatory region sequence-specific DNA binding; C:nucleus; P:regulation of transcription, DNA-dependent	IPR000047; IPR001356; IPR009057; IPR017970; IPR020479; PTHR24331 (PANTHER), PTHR24331:SF2 (PANTHER)
GB13750	protein distal antenna-like	533	F:DNA binding	IPR007889; IPR009057; G3DSA:1.10.1680.10 (GENE3D)
GB13762	protein bric-a-brac 1	322	F:DNA binding	IPR007889; IPR009057; PTHR23110 (PANTHER), PTHR23110:SF37 (PANTHER)
GB13816	calmodulin-binding transcription activator 1	1061	C:nucleus; F:DNA binding; F:protein binding	IPR000048; IPR002110; IPR002909; IPR005559; IPR011989; IPR014756; IPR020683; PTHR23335 (PANTHER), SSF52540 (SUPERFAMILY)
GB13818	polycomb protein scm	721	C:nucleus; F:zinc ion binding; P:regulation of transcription, DNA-dependent; F:protein binding	IPR001660; IPR004092; IPR010507; IPR011017; IPR012313; IPR013761; IPR021129; IPR021987; G3DSA:2.30.30.160 (GENE3D), PTHR12247 (PANTHER), PTHR12247:SF30 (PANTHER), SSF63748 (SUPERFAMILY)
GB13830	muscle segmentation homeobox	433	F:sequence-specific DNA binding transcription factor activity; F:sequence-specific DNA binding; C:nucleus	IPR001356; IPR009057; IPR017970; IPR020479; PTHR24338 (PANTHER), PTHR24338:SF0 (PANTHER)
GB13860	dna-binding protein d-ets-6-like	250	F:sequence-specific DNA binding transcription factor activity; F:sequence-specific DNA binding	IPR000418; IPR011991; PTHR11849 (PANTHER), PTHR11849:SF37 (PANTHER), SSF46785 (SUPERFAMILY)
GB13872	basic helix-loop-helix neural transcription factor tap	232	F:protein dimerization activity	IPR011598; PTHR19290 (PANTHER), PTHR19290:SF38 (PANTHER)
GB13873	forkhead box protein o-like	466	F:sequence-specific DNA binding transcription factor activity; F:sequence-specific DNA binding	IPR001766; IPR011991; PTHR11829 (PANTHER), PTHR11829:SF50 (PANTHER), SSF46785 (SUPERFAMILY)
GB13892	transcription initiation factor tfiid subunit 4	956	F:translation initiation factor activity; P:translational initiation; C:SAGA-type complex; P:regulation of transcription, DNA-dependent; F:DNA binding; F:sequence-specific DNA binding transcription factor activity; P:DNA-dependent transcription, initiation; C:transcription factor TFIID complex; F:protein heterodimerization activity	IPR003894; IPR007900; IPR009072; PTHR15138 (PANTHER), PTHR15138:SF6 (PANTHER)
GB13897	basic helix-loop-helix transcription factor amos	260	F:protein dimerization activity	IPR011598; PTHR19290 (PANTHER), PTHR19290:SF34 (PANTHER)
GB13911	zinc finger protein 160-like	897	F:zinc ion binding; F:nucleic acid binding; C:intracellular; F:olfactory receptor activity; F:odorant binding; P:sensory perception of smell; C:membrane	IPR004117; IPR007087; IPR013087; IPR015880; PTHR24377 (PANTHER), PTHR24377:SF0 (PANTHER), PF13465 (PFAM), PF13894 (PFAM), SSF57667 (SUPERFAMILY)
GB13918	one cut domain family member 2-like	603	F:sequence-specific DNA binding transcription factor activity; F:sequence-specific DNA binding; C:nucleus; P:regulation of transcription, DNA-dependent	IPR001356; IPR003350; IPR009057; IPR010982; PTHR14057 (PANTHER), PTHR14057:SF6 (PANTHER)
GB13981	hepatic leukemia factor-like	330	F:sequence-specific DNA binding transcription factor activity; F:sequence-specific DNA binding; F:protein dimerization activity; P:regulation of transcription, DNA-dependent	IPR004827; G3DSA:1.20.5.170 (GENE3D), PTHR11988 (PANTHER), PTHR11988:SF5 (PANTHER)
GB14027	homeotic protein labial	478	F:sequence-specific DNA binding transcription factor activity; F:sequence-specific DNA binding; C:nucleus; P:regulation of transcription, DNA-dependent	IPR001356; IPR009057; IPR017970; IPR020479; PTHR24326 (PANTHER), PTHR24326:SF21 (PANTHER)
GB14046	dna-binding protein d-ets-3-like	187	F:sequence-specific DNA binding transcription factor activity; F:sequence-specific DNA binding; C:nucleus; P:regulation of transcription, DNA-dependent	IPR000418; IPR011991; PTHR11849 (PANTHER), PTHR11849:SF37 (PANTHER), SignalP-NN(euk) (SIGNALP), SSF46785 (SUPERFAMILY)
GB14062	transcription factor sox-14	564	F:protein binding	IPR009071; PTHR10270 (PANTHER), PTHR10270:SF22 (PANTHER)
GB14070	broad-complex core protein isoforms 1 2 3 4 5	492	F:nucleic acid binding; C:nucleus; F:zinc ion binding; F:protein binding	IPR000210; IPR007087; IPR011333; IPR013069; IPR013087; IPR015880; PTHR23110 (PANTHER), PTHR23110:SF49 (PANTHER), SSF57667 (SUPERFAMILY)
GB14090	zinc finger protein 521-like	831	F:zinc ion binding; F:nucleic acid binding; C:intracellular	IPR006612; IPR007087; IPR013087; IPR015880; IPR022755; PTHR24375 (PANTHER), PTHR24375:SF0 (PANTHER), PF12874 (PFAM), PF13465 (PFAM), PF13894 (PFAM), SSF57667 (SUPERFAMILY)
GB14092	transcription factor collier-like	551	F:metal ion binding; F:DNA binding; P:multicellular organismal development; C:nucleus; P:regulation of transcription, DNA-dependent; F:protein dimerization activity	IPR002909; IPR003523; IPR011598; IPR013783; IPR014756; IPR018350
GB14134	aladin-like isoform 1	1106	F:zinc ion binding; F:nucleic acid binding; C:intracellular; F:protein binding	IPR001680; IPR007087; IPR013087; IPR015880; IPR015943; PTHR19818 (PANTHER), PTHR19818:SF39 (PANTHER), PF13465 (PFAM), SSF101908 (SUPERFAMILY), SSF57667 (SUPERFAMILY)
GB14135	transcription initiation factor tfiid subunit 10-like	126	P:translational initiation; P:DNA-dependent transcription, initiation; F:translation initiation factor activity; C:nucleus	IPR003923; PTHR21242:SF0 (PANTHER)
GB14146	homeobox protein akr-like isoform 2	447	F:sequence-specific DNA binding transcription factor activity; F:sequence-specific DNA binding	IPR001356; IPR008422; IPR009057; PTHR11850 (PANTHER)
GB14165	retinal homeobox protein rx2-like	442	F:sequence-specific DNA binding transcription factor activity; F:sequence-specific DNA binding; C:nucleus; P:regulation of transcription, DNA-dependent	IPR001356; IPR009057; IPR017970; PTHR24329 (PANTHER), PTHR24329:SF103 (PANTHER)
GB14169	gata-binding factor a	715	F:sequence-specific DNA binding transcription factor activity; F:zinc ion binding; F:sequence-specific DNA binding	IPR000679; IPR013088; PTHR10071 (PANTHER), PTHR10071:SF117 (PANTHER), SSF57716 (SUPERFAMILY)
GB14174	myocyte-specific enhancer factor 2	461	F:DNA binding; F:protein dimerization activity; C:nucleus; P:regulation of transcription, DNA-dependent	IPR002100; IPR022102; PTHR11945 (PANTHER), PTHR11945:SF22 (PANTHER)
GB14194	longitudinals lacking isoform g	508	F:DNA binding; F:protein binding	IPR000210; IPR007889; IPR009057; IPR011333; IPR013069; PTHR23110 (PANTHER), PTHR23110:SF55 (PANTHER)
GB14217	nuclear receptor subfamily 2 group e member 1-like	437	P:steroid hormone mediated signaling pathway; P:intracellular receptor mediated signaling pathway; F:zinc ion binding; P:regulation of transcription, DNA-dependent; F:sequence-specific DNA binding; F:steroid hormone receptor activity; F:ligand-activated sequence-specific DNA binding RNA polymerase II transcription factor activity; C:nucleus	IPR000536; IPR001628; IPR001723; IPR008946; PTHR24083 (PANTHER), PTHR24083:SF28 (PANTHER), SSF57716 (SUPERFAMILY)
GB14243	protein tkr	559	F:DNA binding; F:protein binding	IPR000210; IPR007889; IPR009057; IPR011333; IPR013069; PTHR23110 (PANTHER), PTHR23110:SF19 (PANTHER)
GB14274	hairy enhancer-of-split related with yrpw motif protein 1-like	437	P:transcription, DNA-dependent; F:protein dimerization activity	IPR011598; PTHR10985 (PANTHER), PTHR10985:SF53 (PANTHER)
GB14316	carbonic anhydrase-related protein 10-like	1225	F:zinc ion binding; F:nucleic acid binding; C:intracellular; F:carbonate dehydratase activity; C:extracellular region	IPR001148; IPR007087; IPR013087; IPR015880; IPR018347; IPR023561; PF13465 (PFAM), SSF57667 (SUPERFAMILY)
GB14318	lim homeobox protein awh-like	362	F:sequence-specific DNA binding transcription factor activity; F:sequence-specific DNA binding; C:nucleus; F:zinc ion binding; P:regulation of transcription, DNA-dependent	IPR001356; IPR001781; IPR009057; PTHR24208 (PANTHER), PTHR24208:SF8 (PANTHER), SSF57716 (SUPERFAMILY)
GB14319	protein bric-a-brac 2	342	F:nucleic acid binding; C:nucleus; F:zinc ion binding; F:protein binding	IPR000210; IPR007087; IPR011333; IPR013069; IPR013087; IPR015880; PTHR23110 (PANTHER), PTHR23110:SF42 (PANTHER), PF13894 (PFAM), SSF57667 (SUPERFAMILY)
GB14332	transcription factor hes-4	560	F:DNA binding; C:nucleus; P:regulation of transcription, DNA-dependent; F:protein dimerization activity	IPR003650; IPR011598; PTHR10985 (PANTHER), PTHR10985:SF16 (PANTHER)
GB14380	zinc finger protein xfin-like	1275	F:nucleic acid binding; C:nucleus; F:zinc ion binding	IPR007087; IPR012934; IPR013087; IPR015880; PTHR24375 (PANTHER), PTHR24375:SF0 (PANTHER), PF12874 (PFAM), PF13465 (PFAM), PF13894 (PFAM), PF13912 (PFAM), SSF57667 (SUPERFAMILY), SSF57716 (SUPERFAMILY)
GB14416	silk gland factor 1	514	F:sequence-specific DNA binding transcription factor activity; F:sequence-specific DNA binding; F:protein domain specific binding; F:transcription factor binding; C:nucleus; P:regulation of transcription, DNA-dependent	IPR001766; IPR011991; IPR013638; IPR018122; PTHR11829 (PANTHER), SSF46785 (SUPERFAMILY)
GB14483	protein gooseberry-neuro-like	442	F:sequence-specific DNA binding transcription factor activity; P:multicellular organismal development; F:transcription regulatory region sequence-specific DNA binding; C:nucleus; P:regulation of transcription, DNA-dependent	IPR001356; IPR001523; IPR009057; IPR011991; IPR017970; PTHR24329 (PANTHER), PTHR24329:SF105 (PANTHER)
GB14516	homeotic protein distal-less-like	349	F:sequence-specific DNA binding transcription factor activity; F:transcription regulatory region sequence-specific DNA binding; C:nucleus; P:regulation of transcription, DNA-dependent	IPR000047; IPR001356; IPR009057; IPR017970; IPR020479; PTHR24327 (PANTHER), PTHR24327:SF0 (PANTHER)
GB14533	homeobox protein prospero	1206	F:DNA binding; P:multicellular organismal development; C:nucleus; P:regulation of transcription, DNA-dependent	IPR007738; IPR009057; IPR023082
GB14635	zinc finger protein 408-like	744	F:zinc ion binding; F:nucleic acid binding; C:intracellular	IPR007087; IPR013087; IPR015880; PTHR24387 (PANTHER), PF13465 (PFAM), PF13894 (PFAM), SSF57667 (SUPERFAMILY)
GB14649	protein bric-a-brac 2	500	F:DNA binding; F:protein binding	IPR000210; IPR009057; IPR011333; IPR013069; PTHR23110 (PANTHER), PTHR23110:SF15 (PANTHER)
GB14692	zinc finger protein 420	934	F:zinc ion binding; F:nucleic acid binding; C:intracellular	IPR007087; IPR013087; IPR015880; PTHR24375 (PANTHER), PTHR24375:SF0 (PANTHER), PF13465 (PFAM), PF13894 (PFAM), PF13912 (PFAM), SSF57667 (SUPERFAMILY)
GB14696	transcription factor gaga	613	F:nucleic acid binding; C:nucleus; F:zinc ion binding; F:protein binding	IPR000210; IPR007087; IPR011333; IPR013069; IPR013087; IPR015318; IPR015880; PTHR23110 (PANTHER), PTHR23110:SF10 (PANTHER)
GB14790	transcription factor sox-9-like	458	F:protein binding	IPR009071; IPR022151; PTHR10270 (PANTHER), PTHR10270:SF20 (PANTHER)
GB14802	gs homeobox 1	341	F:sequence-specific DNA binding transcription factor activity; F:sequence-specific DNA binding; C:nucleus; P:regulation of transcription, DNA-dependent	IPR001356; IPR009057; IPR017970; IPR020479; PTHR24326 (PANTHER), PTHR24326:SF1 (PANTHER)
GB14816	d site-binding protein	247	F:sequence-specific DNA binding transcription factor activity; F:sequence-specific DNA binding; F:protein dimerization activity; P:regulation of transcription, DNA-dependent	IPR004827; G3DSA:1.20.5.170 (GENE3D), PTHR11988 (PANTHER), PTHR11988:SF14 (PANTHER)
GB14837	n-alpha-acetyltransferase auxiliary subunit-like	1973	F:transferase activity; F:sequence-specific DNA binding transcription factor activity; F:sequence-specific DNA binding; F:zinc ion binding; F:protein binding	IPR001356; IPR001781; IPR009057; IPR011990; IPR013026; IPR019183; IPR021183; PTHR22767 (PANTHER), PTHR22767:SF3 (PANTHER), SSF48452 (SUPERFAMILY), SSF57716 (SUPERFAMILY)
GB14841	zinc finger protein 271	924	F:zinc ion binding; F:nucleic acid binding; C:intracellular	IPR007087; IPR013087; IPR015880; PTHR24397 (PANTHER), PTHR24397:SF17 (PANTHER), PF13465 (PFAM), PF13894 (PFAM), SSF57667 (SUPERFAMILY)
GB14857	protein hairy-like	318	F:DNA binding; C:nucleus; P:regulation of transcription, DNA-dependent; F:protein dimerization activity	IPR003650; IPR011598; PTHR10985 (PANTHER), PTHR10985:SF17 (PANTHER)
GB14867	kruppel-like protein 1	296	F:zinc ion binding; F:nucleic acid binding; C:intracellular	IPR007087; IPR013087; IPR015880; PTHR24375 (PANTHER), PTHR24375:SF54 (PANTHER), PF13465 (PFAM), PF13894 (PFAM), SSF57667 (SUPERFAMILY)
GB14882	transcription factor e2f4-like	330	F:sequence-specific DNA binding transcription factor activity; F:DNA binding; C:transcription factor complex; P:regulation of transcription, DNA-dependent	IPR003316; IPR011991; IPR015633; PTHR12081:SF24 (PANTHER), SSF144074 (SUPERFAMILY), SSF46785 (SUPERFAMILY)
GB14928	zinc finger protein 449-like	316	F:zinc ion binding; F:nucleic acid binding; C:intracellular	IPR007087; IPR013087; IPR015880; PTHR11389 (PANTHER), PTHR11389:SF346 (PANTHER), PF13465 (PFAM), PF13894 (PFAM), SSF57667 (SUPERFAMILY)
GB14932	forkhead transcription factor hcm1	310	F:sequence-specific DNA binding transcription factor activity; F:sequence-specific DNA binding; C:nucleus; P:regulation of transcription, DNA-dependent	IPR001766; IPR011991; IPR018122; PTHR11829 (PANTHER), SSF46785 (SUPERFAMILY)
GB14998	ccaat enhancer-binding protein	353	F:sequence-specific DNA binding transcription factor activity; F:sequence-specific DNA binding; F:protein dimerization activity; P:regulation of transcription, DNA-dependent	IPR004827; G3DSA:1.20.5.170 (GENE3D), PTHR23334 (PANTHER), PTHR23334:SF1 (PANTHER)
GB15027	homeobox protein nkx-	208	F:sequence-specific DNA binding transcription factor activity; F:sequence-specific DNA binding; C:nucleus; P:regulation of transcription, DNA-dependent	IPR001356; IPR009057; IPR017970; IPR020479; PTHR24340 (PANTHER), PTHR24340:SF9 (PANTHER)
GB15041	protein glass-like	445	F:zinc ion binding; F:nucleic acid binding; C:intracellular	IPR007087; IPR013087; IPR015880; PTHR23228 (PANTHER), PTHR23228:SF48 (PANTHER), PF13465 (PFAM), SSF57667 (SUPERFAMILY)
GB15045	hmg box transcription factor bbx	483	F:protein binding	IPR009071; PTHR13059 (PANTHER), PTHR13059:SF1 (PANTHER)
GB15081	serum response factor	351	F:DNA binding; F:protein dimerization activity; C:nucleus; P:regulation of transcription, DNA-dependent	IPR002100; PTHR11945 (PANTHER), PTHR11945:SF32 (PANTHER)
GB15082	isoform e	228	P:developmental pigmentation; P:wing disc anterior/posterior pattern formation; P:compound eye morphogenesis; P:imaginal disc-derived wing morphogenesis; P:organ growth; F:DNA binding; P:negative regulation of transcription from RNA polymerase II promoter; F:sequence-specific DNA binding transcription factor activity; C:nucleus	IPR001699; IPR002070; IPR008967; IPR018186; PTHR11267:SF23 (PANTHER)
GB15089	transcription factor	792	F:zinc ion binding; F:nucleic acid binding; C:intracellular	IPR007087; IPR013087; IPR015880; G3DSA:1.10.510.10 (GENE3D), PTHR23223 (PANTHER), PTHR23223:SF45 (PANTHER), PF13465 (PFAM), SSF57667 (SUPERFAMILY)
GB15091	protein bric-a-brac 1	502	F:DNA binding; F:protein binding	IPR000210; IPR007889; IPR009057; IPR011333; IPR013069; PTHR23110 (PANTHER)
GB15156	longitudinals lacking isoforms a b d l	219	F:zinc ion binding; F:nucleic acid binding; C:intracellular	IPR007087; IPR013087; IPR015880; PTHR11389 (PANTHER), SSF57667 (SUPERFAMILY)
GB15213	homeobox protein six1-like	512	F:sequence-specific DNA binding transcription factor activity; F:transcription regulatory region sequence-specific DNA binding; C:nucleus; P:regulation of transcription, DNA-dependent	IPR001356; IPR009057; IPR017970; PTHR10390 (PANTHER)
GB15269	transcription initiation factor tfiid subunit 6	629	P:translational initiation; F:DNA binding; P:DNA-dependent transcription, initiation; P:regulation of sequence-specific DNA binding transcription factor activity; F:translation initiation factor activity; C:nucleus; F:protein heterodimerization activity	IPR004823; IPR009072; IPR011442; PTHR10221 (PANTHER), PTHR10221:SF7 (PANTHER)
GB15295	homeobox protein	514	F:sequence-specific DNA binding transcription factor activity; F:sequence-specific DNA binding	IPR001356; IPR003654; IPR009057; PTHR24329 (PANTHER), PTHR24329:SF18 (PANTHER)
GB15346	broad-complex core protein isoform 6	614	F:nucleic acid binding; C:nucleus; F:zinc ion binding; F:protein binding	IPR000210; IPR007087; IPR011333; IPR013069; IPR013087; IPR015880; PTHR23110 (PANTHER), PTHR23110:SF23 (PANTHER), PF13894 (PFAM), SSF57667 (SUPERFAMILY)
GB15357	transcription factor hnf-4 homolog	83	P:steroid hormone mediated signaling pathway; F:zinc ion binding; P:regulation of transcription, DNA-dependent; F:sequence-specific DNA binding; F:sequence-specific DNA binding transcription factor activity; F:steroid hormone receptor activity; C:nucleus	IPR000536; IPR008946; PTHR24083 (PANTHER), PTHR24083:SF42 (PANTHER)
GB15420	zinc finger protein 341-like	687	F:zinc ion binding; F:nucleic acid binding; C:intracellular	IPR007087; IPR013083; IPR013087; IPR015880; PTHR24388 (PANTHER), PTHR24388:SF1 (PANTHER), PF13465 (PFAM), PF13894 (PFAM), PF13912 (PFAM), SSF57667 (SUPERFAMILY)
GB15421	zinc c2h2	761	P:epithelial cell migration, open tracheal system; P:germ-band shortening; P:central nervous system development; P:determination of muscle attachment site; P:oxidation-reduction process; F:zinc ion binding; F:nucleic acid binding; P:pigment metabolic process; P:somatic muscle development; F:sepiapterin reductase activity; P:regulation of transcription, DNA-dependent; P:tetrahydrobiopterin biosynt…	IPR007087; IPR013087; IPR015880; PTHR10042 (PANTHER), PF13465 (PFAM), SSF57667 (SUPERFAMILY)
GB15434	ecdysone receptor-like isoform 2	462	P:steroid hormone mediated signaling pathway; F:zinc ion binding; P:regulation of transcription, DNA-dependent; P:ecdysone receptor-mediated signaling pathway; F:steroid binding; F:sequence-specific DNA binding; C:nucleus; F:ecdysteroid hormone receptor activity	IPR000536; IPR001628; IPR001723; IPR003069; IPR008946; IPR013088; PTHR24082 (PANTHER), PTHR24082:SF7 (PANTHER), SSF57716 (SUPERFAMILY)
GB15446	zinc finger protein squeeze isoform 2	367	F:zinc ion binding; F:nucleic acid binding; C:intracellular	IPR007087; IPR013087; IPR015880; PTHR11389 (PANTHER), PTHR11389:SF336 (PANTHER), PF13465 (PFAM), SSF57667 (SUPERFAMILY)
GB15469	paired box protein pax-3-b-like	498	F:sequence-specific DNA binding transcription factor activity; F:sequence-specific DNA binding; P:multicellular organismal development; C:nucleus; P:regulation of transcription, DNA-dependent	IPR001356; IPR001523; IPR009057; IPR011991; IPR017970; PTHR24329 (PANTHER), PTHR24329:SF105 (PANTHER)
GB15566	segmentation polarity homeobox protein engrailed-like	448	F:sequence-specific DNA binding transcription factor activity; P:multicellular organismal development; F:transcription regulatory region sequence-specific DNA binding; C:nucleus; P:regulation of transcription, DNA-dependent	IPR000047; IPR000747; IPR001356; IPR009057; IPR017970; IPR019549; IPR019737; IPR020479; PTHR24341 (PANTHER), PTHR24341:SF0 (PANTHER)
GB15586	homeobox protein nkx- -like	504	F:sequence-specific DNA binding transcription factor activity; F:sequence-specific DNA binding; C:nucleus; P:regulation of transcription, DNA-dependent	IPR001356; IPR009057; IPR017970; IPR020479; PTHR24340 (PANTHER), PTHR24340:SF9 (PANTHER)
GB15632	protein gooseberry-like	404	F:sequence-specific DNA binding transcription factor activity; F:sequence-specific DNA binding; P:multicellular organismal development; C:nucleus; P:regulation of transcription, DNA-dependent	IPR001356; IPR001523; IPR009057; IPR011991; IPR017970; PTHR24329 (PANTHER), PTHR24329:SF105 (PANTHER)
GB15642	probable nuclear hormone receptor hr38	713	P:steroid hormone mediated signaling pathway; P:intracellular receptor mediated signaling pathway; F:zinc ion binding; P:regulation of transcription, DNA-dependent; F:sequence-specific DNA binding; F:steroid hormone receptor activity; F:ligand-activated sequence-specific DNA binding RNA polymerase II transcription factor activity; C:nucleus	IPR000536; IPR001628; IPR001723; IPR003070; IPR003073; IPR008946; IPR013088; PTHR24085 (PANTHER), SSF57716 (SUPERFAMILY)
GB15643	pou class transcription factor 2	690	F:sequence-specific DNA binding transcription factor activity; F:sequence-specific DNA binding; C:nucleus; P:regulation of transcription, DNA-dependent	IPR000327; IPR001356; IPR009057; IPR010982; IPR013847; PTHR11636 (PANTHER), PTHR11636:SF7 (PANTHER)
GB15645	nuclear factor of activated t-cells 5	1055	F:sequence-specific DNA binding transcription factor activity; C:nucleus; P:regulation of transcription, DNA-dependent; F:protein binding	IPR002909; IPR008366; IPR008967; IPR011539; IPR013783; IPR014756; PTHR12533:SF7 (PANTHER)
GB15651	lim homeobox protein lhx3-like	620	F:sequence-specific DNA binding transcription factor activity; F:sequence-specific DNA binding; C:nucleus; F:zinc ion binding; P:regulation of transcription, DNA-dependent	IPR001356; IPR001781; IPR009057; IPR017970; PTHR24208 (PANTHER), PTHR24208:SF21 (PANTHER), SSF57716 (SUPERFAMILY)
GB15683	brain-specific homeobox protein homolog	215	F:sequence-specific DNA binding transcription factor activity; F:sequence-specific DNA binding; C:nucleus; P:regulation of transcription, DNA-dependent	IPR001356; IPR009057; IPR017970; IPR020479; PTHR24327 (PANTHER), PTHR24327:SF3 (PANTHER)
GB15698	paired box protein pax-	678	F:sequence-specific DNA binding transcription factor activity; F:sequence-specific DNA binding; P:multicellular organismal development; C:nucleus; P:regulation of transcription, DNA-dependent	IPR001356; IPR001523; IPR009057; IPR011991; IPR017970; PTHR24329 (PANTHER), PTHR24329:SF127 (PANTHER)
GB15725	basic helix-loop-helix transcription factor amos	294	F:protein dimerization activity	IPR011598; PTHR19290 (PANTHER), PTHR19290:SF34 (PANTHER)
GB15739	zinc finger protein 62 homolog	1426	F:nucleic acid binding; C:nucleus; F:zinc ion binding	IPR007087; IPR012934; IPR013087; IPR015880; PTHR24375 (PANTHER), PTHR24375:SF0 (PANTHER), PF13465 (PFAM), PF13894 (PFAM), SSF57667 (SUPERFAMILY), SSF57716 (SUPERFAMILY)
GB15744	histone-lysine n-methyltransferase setd1b	1503	P:histone lysine methylation; F:nucleic acid binding; F:histone-lysine N-methyltransferase activity; C:nucleus; F:nucleotide binding; F:protein binding	IPR000504; IPR001214; IPR003616; IPR012677; IPR015722; IPR024657; G3DSA:2.170.270.10 (GENE3D), PTHR22884 (PANTHER), SSF54928 (SUPERFAMILY), SSF82199 (SUPERFAMILY)
GB15778	protein suppressor of hairy wing-like	627	F:zinc ion binding; F:nucleic acid binding; C:intracellular	IPR007087; IPR013087; IPR015880; PTHR24375 (PANTHER), PTHR24375:SF0 (PANTHER), PF13465 (PFAM), SSF57667 (SUPERFAMILY)
GB15791	doublesex- and mab-3-related transcription factor a2	551	F:sequence-specific DNA binding; P:sex differentiation; C:nucleus; P:regulation of transcription, DNA-dependent; F:protein binding	IPR001275; IPR005173; IPR009060; IPR026607; PTHR12322:SF16 (PANTHER)
GB15795	zinc finger protein 84	439	F:nucleic acid binding; C:nucleus; F:zinc ion binding	IPR007087; IPR012934; IPR013087; IPR015880; PTHR11389 (PANTHER), PF13465 (PFAM), PF13894 (PFAM), SSF57667 (SUPERFAMILY), SSF57716 (SUPERFAMILY)
GB15811	protein abrupt	327	F:nucleic acid binding; C:nucleus; F:zinc ion binding	IPR007087; IPR015880; PTHR23110 (PANTHER), PTHR23110:SF3 (PANTHER), PF13894 (PFAM), SSF57667 (SUPERFAMILY)
GB15836	protein lozenge	631	F:sequence-specific DNA binding transcription factor activity; F:DNA binding; F:ATP binding; C:nucleus; P:regulation of transcription, DNA-dependent	IPR000040; IPR008967; IPR012346; IPR013524
GB15837	homeobox protein extradenticle-like	399	P:eye development; P:regulation of transcription from RNA polymerase II promoter; P:protein import into nucleus, translocation; C:transcription factor complex; F:sequence-specific DNA binding; P:peripheral nervous system development; F:sequence-specific DNA binding transcription factor activity	IPR001356; IPR005542; IPR009057; IPR017970; PTHR11850 (PANTHER), PTHR11850:SF49 (PANTHER)
GB15857	zinc finger protein 426-like	362	F:zinc ion binding; F:nucleic acid binding; C:intracellular	IPR007087; IPR013087; IPR015880; PTHR23223 (PANTHER), PTHR23223:SF17 (PANTHER), PF13465 (PFAM), SSF57667 (SUPERFAMILY)
GB15858	paired amphipathic helix protein sin3a	1466	C:nucleus; P:regulation of transcription, DNA-dependent	IPR003822; IPR013194; PTHR12346 (PANTHER)
GB15894	short stature homeobox protein 2-like	373	F:sequence-specific DNA binding transcription factor activity; F:transcription regulatory region sequence-specific DNA binding; C:nucleus; P:regulation of transcription, DNA-dependent	IPR000047; IPR001356; IPR003654; IPR009057; IPR017970; PTHR24329 (PANTHER), PTHR24329:SF142 (PANTHER)
GB15896	metastasis-associated protein mta1	824	F:sequence-specific DNA binding transcription factor activity; F:sequence-specific DNA binding; C:intracellular; F:zinc ion binding; P:regulation of transcription, DNA-dependent; F:chromatin binding	IPR000679; IPR000949; IPR001005; IPR001025; IPR007087; IPR009057; IPR013087; IPR015880; IPR017884; PTHR10865 (PANTHER), PTHR10865:SF3 (PANTHER), SSF57716 (SUPERFAMILY)
GB15901	transcription initiation factor tfiid subunit 5	652	P:translational initiation; F:translation initiation factor activity; C:nucleus; P:regulation of transcription, DNA-dependent; F:protein binding	IPR001680; IPR007582; IPR015943; IPR017986; IPR019775; IPR020472; PTHR19879 (PANTHER), PTHR19879:SF0 (PANTHER)
GB15903	probable histone acetyltransferase myst1	455	F:transferase activity, transferring acyl groups other than amino-acyl groups; C:nucleus; F:zinc ion binding; P:regulation of transcription, DNA-dependent	IPR000953; IPR002717; IPR015880; IPR016181; IPR016197; IPR025995; G3DSA:2.30.30.270 (GENE3D), PTHR10615 (PANTHER), PTHR10615:SF34 (PANTHER)
GB15909	dna-binding protein ewg	550	F:DNA binding	IPR019525; PTHR20338 (PANTHER)
GB15934	-like 1 homeobox protein	290	F:sequence-specific DNA binding transcription factor activity; F:sequence-specific DNA binding; C:integral to membrane; C:nucleus; P:regulation of transcription, DNA-dependent	IPR001356; IPR009057; IPR017970; IPR020479; PTHR24339 (PANTHER), PTHR24339:SF19 (PANTHER)
GB15945	protein embryonic gonad	372	P:steroid hormone mediated signaling pathway; F:zinc ion binding; P:regulation of transcription, DNA-dependent; F:sequence-specific DNA binding; F:sequence-specific DNA binding transcription factor activity; F:steroid hormone receptor activity; C:nucleus	IPR001628; IPR008946; IPR013088; PTHR24079 (PANTHER), PTHR24079:SF4 (PANTHER), SSF57716 (SUPERFAMILY)
GB15979	transcription elongation regulator 1-like	1180	F:protein binding	IPR001202; IPR002713; PTHR15377 (PANTHER), PTHR15377:SF3 (PANTHER)
GB16053	protein krueppel-like	524	P:segmentation; C:nucleus; F:DNA binding; F:zinc ion binding	IPR007087; IPR013087; IPR015880; PTHR23228 (PANTHER), PTHR23228:SF28 (PANTHER), PF13465 (PFAM), SSF57667 (SUPERFAMILY)
GB16085	pou domain protein cf1a-like	460	F:sequence-specific DNA binding transcription factor activity; F:sequence-specific DNA binding; C:nucleus; P:regulation of transcription, DNA-dependent	IPR000327; IPR001356; IPR009057; IPR010982; IPR013847; IPR016362; IPR017970; PTHR11636 (PANTHER), PTHR11636:SF23 (PANTHER)
GB16096	transcription factor -like	132	F:sequence-specific DNA binding transcription factor activity; F:sequence-specific DNA binding; C:nucleus; P:regulation of transcription, DNA-dependent	IPR004826; IPR004827; IPR008917; IPR024874; G3DSA:1.20.5.170 (GENE3D), PTHR10129:SF1 (PANTHER)
GB16116	zinc finger protein 43-like	210	F:nucleic acid binding; F:hydrolase activity; C:nucleus; F:zinc ion binding	IPR007087; IPR013087; IPR015880; PTHR24387 (PANTHER), PF12756 (PFAM), PF13465 (PFAM), SSF57667 (SUPERFAMILY)
GB16131	zinc finger protein 643-like	158	F:zinc ion binding; F:nucleic acid binding; C:intracellular	IPR001878; IPR007087; IPR013087; IPR015880; PTHR23228 (PANTHER), PTHR23228:SF42 (PANTHER), PF13465 (PFAM), PF13912 (PFAM), SSF57667 (SUPERFAMILY)
GB16145	zinc finger and scan domain-containing protein 2-like	440	F:zinc ion binding; F:nucleic acid binding; C:intracellular	IPR007087; IPR013087; IPR015880; PTHR14196 (PANTHER), PF13465 (PFAM), PF13894 (PFAM), SSF57667 (SUPERFAMILY)
GB16151	paired mesoderm homeobox protein 2	231	F:sequence-specific DNA binding transcription factor activity; F:sequence-specific DNA binding; C:nucleus; P:regulation of transcription, DNA-dependent	IPR001356; IPR009057; IPR017970; PTHR24329 (PANTHER), PTHR24329:SF19 (PANTHER)
GB16177	forkhead box protein e4-like	426	F:sequence-specific DNA binding transcription factor activity; F:sequence-specific DNA binding; C:nucleus; P:regulation of transcription, DNA-dependent	IPR001766; IPR011991; IPR018122; PTHR11829 (PANTHER), SSF46785 (SUPERFAMILY)
GB16224	zinc finger protein 184-like	939	F:zinc ion binding; C:nucleus; F:DNA binding	IPR007087; IPR012934; IPR013087; IPR015880; IPR017956; PTHR24402 (PANTHER), PF13465 (PFAM), PF13894 (PFAM), SSF57667 (SUPERFAMILY), SSF57716 (SUPERFAMILY)
GB16237	transcription factor castor	1516	F:zinc ion binding; C:intracellular; F:DNA binding	IPR007087; IPR015880; IPR017956; PTHR12451 (PANTHER), PTHR12451:SF0 (PANTHER)
GB16259	homeobox protein msx-	311	F:sequence-specific DNA binding transcription factor activity; F:transcription regulatory region sequence-specific DNA binding; C:nucleus; P:regulation of transcription, DNA-dependent	IPR001356; IPR009057; IPR017970; IPR020479; PTHR24340 (PANTHER), PTHR24340:SF0 (PANTHER)
GB16262	pou class transcription factor 1	844	F:sequence-specific DNA binding transcription factor activity; F:sequence-specific DNA binding; C:nucleus; P:regulation of transcription, DNA-dependent	IPR000327; IPR001356; IPR009057; IPR010982; IPR013847; IPR017970; PTHR11636 (PANTHER), PTHR11636:SF19 (PANTHER)
GB16330	histone-lysine n-methyltransferase trithorax	3492	P:histone lysine methylation; F:zinc ion binding; P:regulation of transcription, DNA-dependent; F:histone-lysine N-methyltransferase activity; F:sequence-specific DNA binding; F:sequence-specific DNA binding transcription factor activity; C:nucleus; F:protein binding	IPR001214; IPR001628; IPR001965; IPR003616; IPR003888; IPR003889; IPR011011; IPR013083; IPR015722; IPR019787; G3DSA:2.170.270.10 (GENE3D), PTHR22884 (PANTHER), PF13771 (PFAM), SSF82199 (SUPERFAMILY)
GB16366	protein bric-a-brac 1	375	F:DNA binding; F:protein binding	IPR000210; IPR011333; IPR013069; PTHR23110 (PANTHER), PTHR23110:SF24 (PANTHER)
GB16431	protein lozenge	625	F:sequence-specific DNA binding transcription factor activity; F:DNA binding; F:ATP binding; C:nucleus; P:regulation of transcription, DNA-dependent	IPR000040; IPR008967; IPR012346; IPR013524
GB16435	cyclic amp-dependent transcription factor atf-6 alpha	618	F:sequence-specific DNA binding transcription factor activity; F:sequence-specific DNA binding; F:protein dimerization activity; C:nucleus; P:regulation of transcription, DNA-dependent	IPR001630; IPR004827; G3DSA:1.20.5.170 (GENE3D), PTHR22952 (PANTHER), PTHR22952:SF22 (PANTHER)
GB16457	zinc finger protein ush-like	1038	F:zinc ion binding; F:nucleic acid binding; C:intracellular	IPR007087; IPR013087; IPR015880; PTHR12958 (PANTHER), PTHR12958:SF3 (PANTHER), PF13912 (PFAM), SSF57667 (SUPERFAMILY)
GB16486	transcriptional enhancer factor tef-	454	F:sequence-specific DNA binding transcription factor activity; C:nucleus; P:regulation of transcription, DNA-dependent	IPR000818; IPR016361
GB16496	polycomb protein sfmbt-like	632	C:nucleus; F:zinc ion binding; P:regulation of transcription, DNA-dependent; F:protein binding	IPR001660; IPR004092; IPR013761; IPR021129; G3DSA:2.30.30.160 (GENE3D), PTHR12247 (PANTHER), PTHR12247:SF42 (PANTHER), SSF63748 (SUPERFAMILY)
GB16509	zinc finger protein 423 homolog	1318	F:zinc ion binding; F:nucleic acid binding; C:intracellular	IPR007087; IPR013087; IPR015880; PTHR24401 (PANTHER), PTHR24401:SF6 (PANTHER), PF13465 (PFAM), PF13894 (PFAM), SSF57667 (SUPERFAMILY)
GB16648	ultraspiracle protein	427	P:steroid hormone mediated signaling pathway; F:zinc ion binding; P:regulation of transcription, DNA-dependent; F:sequence-specific DNA binding; F:sequence-specific DNA binding transcription factor activity; F:steroid hormone receptor activity; C:nucleus	IPR000003; IPR000536; IPR001628; IPR001723; IPR008946; IPR013088; PTHR24083 (PANTHER), PTHR24083:SF39 (PANTHER), SSF57716 (SUPERFAMILY)
GB16657	metal-response element-binding transcription factor 2	824	F:zinc ion binding; F:protein binding	IPR001965; IPR011011; IPR013083; IPR019786; IPR019787; IPR025894; PTHR12628 (PANTHER), PTHR12628:SF8 (PANTHER), SSF63748 (SUPERFAMILY)
GB16661	homeobox protein arx	250	F:sequence-specific DNA binding transcription factor activity; F:sequence-specific DNA binding; C:nucleus; P:regulation of transcription, DNA-dependent	IPR001356; IPR009057; IPR017970; PTHR24329 (PANTHER), PTHR24329:SF85 (PANTHER)
GB16666	dna-binding protein d-ets-4	603	F:sequence-specific DNA binding transcription factor activity; F:sequence-specific DNA binding; C:nucleus; P:regulation of transcription, DNA-dependent	IPR000418; IPR003118; IPR011991; IPR013761; PTHR11849 (PANTHER), PTHR11849:SF87 (PANTHER), SSF46785 (SUPERFAMILY)
GB16690	zinc finger protein 160-like	810	F:zinc ion binding; F:nucleic acid binding; C:intracellular	IPR007087; IPR013087; IPR015880; PTHR24384 (PANTHER), PTHR24384:SF0 (PANTHER), PF13465 (PFAM), PF13894 (PFAM), PF13912 (PFAM), SSF57667 (SUPERFAMILY)
GB16704	transcription initiation factor tfiid subunit 2-like	1193	P:translational initiation; P:methylation; F:translation initiation factor activity; F:zinc ion binding; F:methyltransferase activity; F:metallopeptidase activity	IPR014782; PTHR15137 (PANTHER), SSF55486 (SUPERFAMILY), SSF63737 (SUPERFAMILY)
GB16706	zinc finger homeobox protein 3-like	2973	F:sequence-specific DNA binding transcription factor activity; F:sequence-specific DNA binding; C:nucleus; F:zinc ion binding; P:regulation of transcription, DNA-dependent	IPR001356; IPR003604; IPR007087; IPR009057; IPR013087; IPR015880; IPR017970; PTHR24208 (PANTHER), PTHR24208:SF39 (PANTHER), PF13894 (PFAM), SSF57667 (SUPERFAMILY)
GB16736	cyclic amp-dependent transcription factor atf-2-like	527	F:sequence-specific DNA binding transcription factor activity; F:sequence-specific DNA binding; C:intracellular; F:protein dimerization activity; F:zinc ion binding; P:regulation of transcription, DNA-dependent	IPR004827; IPR007087; IPR013087; IPR015880; G3DSA:1.20.5.170 (GENE3D), PTHR19304 (PANTHER)
GB16756	protein alpha isoform	504	F:DNA binding; F:protein binding	IPR000210; IPR007889; IPR009057; IPR011333; IPR013069; PTHR23110 (PANTHER), PTHR23110:SF14 (PANTHER)
GB16761	homeobox protein six3	248	F:sequence-specific DNA binding transcription factor activity; F:sequence-specific DNA binding; C:nucleus; P:regulation of transcription, DNA-dependent	IPR001356; IPR009057; PTHR10390 (PANTHER), PTHR10390:SF17 (PANTHER)
GB16784	homeobox protein nkx- -like	419	F:sequence-specific DNA binding transcription factor activity; F:sequence-specific DNA binding; C:nucleus; P:regulation of transcription, DNA-dependent	IPR001356; IPR009057; IPR017970; IPR020479; PTHR24340 (PANTHER), PTHR24340:SF9 (PANTHER)
GB16785	transcription factor sp3-like	322	F:sequence-specific DNA binding; C:intracellular; P:bone morphogenesis; F:zinc ion binding; P:tail morphogenesis	IPR007087; IPR013087; IPR015880; PTHR23223 (PANTHER), PTHR23223:SF15 (PANTHER), PF13465 (PFAM), SSF57667 (SUPERFAMILY)
GB16786	hypoxia-inducible factor 1 alpha	935	F:signal transducer activity; P:regulation of transcription, DNA-dependent; C:transcription factor complex; F:DNA binding; F:sequence-specific DNA binding transcription factor activity; P:signal transduction; C:cytoplasm; F:protein dimerization activity	IPR000014; IPR001067; IPR001610; IPR011598; IPR013655; IPR013767; G3DSA:3.30.450.20 (GENE3D), PTHR23043 (PANTHER), PTHR23043:SF5 (PANTHER), SSF55785 (SUPERFAMILY)
GB16808	zinc finger x-linked protein zxdb	1394	F:zinc ion binding; F:nucleic acid binding; C:intracellular	IPR007087; IPR013087; IPR015880; PTHR19818 (PANTHER), PTHR19818:SF18 (PANTHER), PF13465 (PFAM), PF13894 (PFAM), SSF57667 (SUPERFAMILY)
GB16863	hormone receptor 4-like	850	P:steroid hormone mediated signaling pathway; F:zinc ion binding; P:regulation of transcription, DNA-dependent; F:sequence-specific DNA binding; F:sequence-specific DNA binding transcription factor activity; F:steroid hormone receptor activity; C:nucleus	IPR000536; IPR001628; IPR001723; IPR008946; IPR013088; PTHR24080 (PANTHER), SSF57716 (SUPERFAMILY)
GB16866	orthodenticle 1	467	F:sequence-specific DNA binding transcription factor activity; F:sequence-specific DNA binding; C:nucleus; P:regulation of transcription, DNA-dependent	IPR001356; IPR009057; IPR017970; PTHR24329 (PANTHER), PTHR24329:SF128 (PANTHER)
GB16867	t-box transcription factor tbx20-like	362	F:sequence-specific DNA binding transcription factor activity; F:DNA binding; C:nucleus; P:regulation of transcription, DNA-dependent	IPR001699; IPR008967; IPR018186; PTHR11267:SF49 (PANTHER)
GB16873	nuclear hormone receptor ftz-f1-like	685	P:steroid hormone mediated signaling pathway; F:zinc ion binding; P:regulation of transcription, DNA-dependent; F:sequence-specific DNA binding; F:sequence-specific DNA binding transcription factor activity; F:steroid hormone receptor activity; C:nucleus	IPR000536; IPR001628; IPR001723; IPR008946; IPR013088; PTHR24086 (PANTHER), PTHR24086:SF0 (PANTHER), SSF57716 (SUPERFAMILY)
GB16901	zinc finger protein 480-like	1366	F:nucleic acid binding; C:nucleus; F:zinc ion binding	IPR007087; IPR012934; IPR013087; IPR015880; PTHR24375 (PANTHER), PTHR24375:SF0 (PANTHER), PF13465 (PFAM), PF13894 (PFAM), SSF57667 (SUPERFAMILY), SSF57716 (SUPERFAMILY)
GB16957	low quality protein: otoferlin-like	1966	F:protein binding; F:sequence-specific DNA binding transcription factor activity; F:sequence-specific DNA binding; F:zinc ion binding; C:integral to membrane; C:nucleus	IPR000008; IPR001356; IPR001781; IPR008973; IPR009057; IPR012561; IPR012968; IPR017970; IPR018029; G3DSA:2.60.40.150 (GENE3D), PTHR12546 (PANTHER), SSF57716 (SUPERFAMILY)
GB16960	zinc finger protein 726-like	388	F:zinc ion binding; F:nucleic acid binding; C:intracellular; F:protein binding	IPR001214; IPR007087; IPR013087; IPR015880; G3DSA:2.170.270.10 (GENE3D), PTHR23228 (PANTHER), PTHR23228:SF87 (PANTHER), PF13465 (PFAM), PF13912 (PFAM), SSF57667 (SUPERFAMILY)
GB17028	tubulin polyglutamylase ttll4-like	735	F:tubulin-tyrosine ligase activity; F:DNA binding; P:cellular protein modification process; F:ATP binding; C:nucleus; P:regulation of transcription, DNA-dependent; F:protein dimerization activity	IPR003650; IPR004344; IPR011598; IPR013816; PTHR12241 (PANTHER), PTHR12241:SF9 (PANTHER), SSF56059 (SUPERFAMILY)
GB17030	transcription factor gata-4	981	F:sequence-specific DNA binding transcription factor activity; F:sequence-specific DNA binding; F:zinc ion binding; P:regulation of transcription, DNA-dependent	IPR000679; IPR013088; PTHR10071 (PANTHER), SSF57716 (SUPERFAMILY)
GB17048	zinc finger protein 91-like	751	F:nucleic acid binding; C:nucleus; F:zinc ion binding	IPR007087; IPR012934; IPR013087; IPR015880; PTHR24375 (PANTHER), PTHR24375:SF0 (PANTHER), PF13465 (PFAM), PF13894 (PFAM), SSF57667 (SUPERFAMILY), SSF57716 (SUPERFAMILY)
GB17053	dorsal root ganglia homeobox protein	174	F:sequence-specific DNA binding transcription factor activity; F:sequence-specific DNA binding; P:multicellular organismal development; C:nucleus; P:regulation of transcription, DNA-dependent	IPR001356; IPR009057; IPR017970; PTHR24329 (PANTHER)
GB17083	b-cell cll lymphoma 6 member b	557	F:nucleic acid binding; C:nucleus; F:zinc ion binding; F:protein binding	IPR000210; IPR007087; IPR011333; IPR013069; IPR013087; IPR015880; PTHR23110 (PANTHER), PF13465 (PFAM), SSF57667 (SUPERFAMILY)
GB17086	t-related protein	607	F:sequence-specific DNA binding transcription factor activity; F:DNA binding; C:nucleus; P:regulation of transcription, DNA-dependent	IPR001699; IPR002070; IPR008967; IPR018186; PTHR11267:SF15 (PANTHER)
GB17099	protein shuttle craft-like	1271	F:sequence-specific DNA binding transcription factor activity; F:nucleic acid binding; C:nucleus; F:zinc ion binding; P:regulation of transcription, DNA-dependent; F:protein binding	IPR000967; IPR001374; IPR001841; IPR019786; IPR019787; G3DSA:3.30.1370.50 (GENE3D), PTHR12360 (PANTHER), PTHR12360:SF0 (PANTHER), SSF57850 (SUPERFAMILY), SSF82708 (SUPERFAMILY)
GB17100	steroid receptor seven- isoforms b c-like	324	P:neuron-neuron synaptic transmission; F:zinc ion binding; F:steroid hormone receptor activity; P:regulation of transcription, DNA-dependent; F:ligand-activated sequence-specific DNA binding RNA polymerase II transcription factor activity; P:R3/R4 cell fate commitment; C:cytoplasm; P:epithelial cell proliferation involved in Malpighian tubule morphogenesis; F:protein heterodimerization activity; …	IPR000536; IPR001628; IPR001723; IPR003068; IPR008946; IPR013088; PTHR24083 (PANTHER), PTHR24083:SF46 (PANTHER), SSF57716 (SUPERFAMILY)
GB17107	circadian locomoter output cycles protein kaput	697	F:signal transducer activity; P:regulation of transcription, DNA-dependent; C:transcription factor complex; F:DNA binding; F:sequence-specific DNA binding transcription factor activity; P:signal transduction; C:cytoplasm; F:protein dimerization activity	IPR000014; IPR001067; IPR001610; IPR011598; IPR013655; IPR013767; G3DSA:3.30.450.20 (GENE3D), PTHR23042 (PANTHER), PTHR23042:SF1 (PANTHER), SSF55785 (SUPERFAMILY)
GB17109	transcription factor ap-2	434	F:sequence-specific DNA binding transcription factor activity; C:nucleus	IPR004979; IPR013854; PTHR10812:SF1 (PANTHER)
GB17118	camp-responsive element-binding 2-like	80	F:sequence-specific DNA binding transcription factor activity; F:sequence-specific DNA binding; F:protein dimerization activity; P:regulation of transcription, DNA-dependent	IPR004827; G3DSA:1.20.5.170 (GENE3D), PTHR21051 (PANTHER)
GB17187	transcription initiation factor tfiid subunit 7-like	404	P:translational initiation; C:transcription factor TFIID complex; P:transcription initiation from RNA polymerase II promoter; F:translation initiation factor activity	IPR006751; PTHR12228 (PANTHER), PTHR12228:SF0 (PANTHER)
GB17213	protein charlatan	458	F:zinc ion binding; F:nucleic acid binding; C:intracellular	IPR007087; IPR013087; IPR015880; PTHR11389 (PANTHER), PTHR11389:SF383 (PANTHER), PF13894 (PFAM), SSF57667 (SUPERFAMILY)
GB17328	mushroom body large-type kenyon cell-specific protein 1	1597	P:memory; F:sequence-specific DNA binding; F:protein homodimerization activity; P:positive regulation of transcription, DNA-dependent; C:nucleus	IPR007889; IPR009057; PTHR21545 (PANTHER), PTHR21545:SF13 (PANTHER)
GB17352	zinc finger protein 642-like isoform 1	388	F:zinc ion binding; F:nucleic acid binding; C:intracellular	IPR007087; IPR013087; IPR015880; PTHR24375 (PANTHER), PTHR24375:SF0 (PANTHER), PF13465 (PFAM), PF13894 (PFAM), SSF57667 (SUPERFAMILY)
GB17378	low quality protein: ctp synthase-like	604	P:DNA-dependent DNA replication initiation; F:DNA binding; F:CTP synthase activity; F:ATP binding; C:nucleus; P:pyrimidine nucleotide biosynthetic process	IPR004468; IPR017456; IPR017926; G3DSA:3.40.50.300 (GENE3D), G3DSA:3.40.50.880 (GENE3D), PTHR11550:SF0 (PANTHER), SSF52317 (SUPERFAMILY), SSF52540 (SUPERFAMILY)
GB17391	krueppel-like factor 15	106	F:zinc ion binding; F:nucleic acid binding; C:intracellular	IPR007087; IPR013087; IPR015880; PTHR23223 (PANTHER), PTHR23223:SF19 (PANTHER), PF13465 (PFAM), SSF57667 (SUPERFAMILY)
GB17406	scy1-like protein 2-like	1096	F:ATP binding; P:protein phosphorylation; F:protein kinase activity; F:zinc ion binding; C:nucleus; F:nucleic acid binding	IPR000719; IPR007087; IPR011009; IPR011989; IPR012934; IPR013087; IPR015880; IPR016024; G3DSA:1.10.510.10 (GENE3D), PTHR12984 (PANTHER), PTHR12984:SF11 (PANTHER), PF13465 (PFAM), SSF57667 (SUPERFAMILY), SSF57716 (SUPERFAMILY)
GB17486	krueppel-like factor 5	568	F:zinc ion binding; F:nucleic acid binding; C:intracellular; F:receptor activity; F:transporter activity; P:transport; C:membrane	IPR000531; IPR007087; IPR013087; IPR015880; PTHR23223 (PANTHER), PTHR23223:SF63 (PANTHER), PF13465 (PFAM), SSF57667 (SUPERFAMILY)
GB17511	x-box-binding protein 1	439	F:sequence-specific DNA binding transcription factor activity; F:sequence-specific DNA binding	IPR004827; IPR008917; G3DSA:1.20.5.170 (GENE3D), PTHR13301 (PANTHER), PTHR13301:SF15 (PANTHER)
GB17527	zinc finger protein 91-like	623	F:nucleic acid binding; C:nucleus; F:zinc ion binding	IPR007087; IPR012934; IPR013087; IPR015880; PTHR24375 (PANTHER), PTHR24375:SF0 (PANTHER), PF12874 (PFAM), PF13465 (PFAM), SSF57667 (SUPERFAMILY), SSF57716 (SUPERFAMILY)
GB17555	isoform d	527	F:sequence-specific DNA binding transcription factor activity; C:nucleus; F:zinc ion binding	IPR001781; IPR010442; PTHR24205 (PANTHER), PTHR24205:SF0 (PANTHER), SSF57716 (SUPERFAMILY)
GB17582	zinc finger protein 615-like	735	F:zinc ion binding; F:nucleic acid binding; C:intracellular	IPR007087; IPR013087; IPR015880; PTHR24406 (PANTHER), PTHR24406:SF5 (PANTHER), PF13465 (PFAM), PF13912 (PFAM), SSF57667 (SUPERFAMILY)
GB17617	fruitless isoform b	405	F:nucleic acid binding; C:nucleus; F:zinc ion binding; F:protein binding	IPR000210; IPR011333; IPR013069; IPR013087; IPR015880; PTHR23110 (PANTHER), PTHR23110:SF36 (PANTHER)
GB17640	pipsqueak	647	F:DNA binding; F:protein binding	IPR000210; IPR007889; IPR009057; IPR011333; IPR013069; PTHR23110 (PANTHER), PTHR23110:SF4 (PANTHER)
GB17760	nuclear factor 1 x-type-like isoform 1	276	P:DNA replication; F:sequence-specific DNA binding transcription factor activity; C:nucleus; P:regulation of transcription, DNA-dependent	IPR000647; IPR003619; IPR019548; IPR020604
GB17763	aryl hydrocarbon receptor nuclear translocator homolog	777	F:signal transducer activity; P:regulation of transcription, DNA-dependent; C:transcription factor complex; F:receptor activity; F:DNA binding; F:sequence-specific DNA binding transcription factor activity; P:signal transduction; C:cytoplasm; F:protein dimerization activity	IPR000014; IPR001067; IPR001610; IPR011598; IPR013655; IPR013767; G3DSA:3.30.450.20 (GENE3D), PTHR23042 (PANTHER), PTHR23042:SF9 (PANTHER), SSF55785 (SUPERFAMILY)
GB17775	nuclear receptor subfamily 2 group f member 6	402	P:steroid hormone mediated signaling pathway; F:zinc ion binding; P:regulation of transcription, DNA-dependent; F:sequence-specific DNA binding; F:sequence-specific DNA binding transcription factor activity; F:steroid hormone receptor activity; C:nucleus	IPR000536; IPR001628; IPR001723; IPR008946; IPR013088; PTHR24083 (PANTHER), SSF57716 (SUPERFAMILY)
GB17814	probable nuclear hormone receptor hr38	672	P:steroid hormone mediated signaling pathway; F:zinc ion binding; P:regulation of transcription, DNA-dependent; F:sequence-specific DNA binding; F:steroid hormone receptor activity; C:nucleus; F:retinoic acid receptor activity; P:retinoic acid receptor signaling pathway	IPR000536; IPR001628; IPR001723; IPR003078; IPR008946; IPR013088; PTHR24085 (PANTHER), SSF57716 (SUPERFAMILY)
GB17871	protein trachealess-like isoform 1	1167	F:signal transducer activity; F:DNA binding; P:signal transduction; C:nucleus; P:regulation of transcription, DNA-dependent; F:protein dimerization activity	IPR000014; IPR001610; IPR011598; IPR013655; IPR013767; G3DSA:3.30.450.20 (GENE3D), PTHR23043 (PANTHER), PTHR23043:SF4 (PANTHER), SSF55785 (SUPERFAMILY)
GB17910	zinc finger protein 808-like	432	F:zinc ion binding; F:nucleic acid binding; C:intracellular; F:protein binding	IPR001841; IPR007087; IPR013087; IPR015880; PTHR11389 (PANTHER), PF13465 (PFAM), PF13894 (PFAM), SSF57667 (SUPERFAMILY)
GB17935	ets dna-binding protein pokkuri-like	320	F:sequence-specific DNA binding transcription factor activity; F:sequence-specific DNA binding; C:nucleus; P:regulation of transcription, DNA-dependent	IPR003118; IPR013761; PTHR11849 (PANTHER), PTHR11849:SF20 (PANTHER)
GB17945	homeobox protein cut	1769	F:sequence-specific DNA binding transcription factor activity; F:sequence-specific DNA binding; C:nucleus; P:regulation of transcription, DNA-dependent	IPR001356; IPR003350; IPR009057; IPR010982; IPR017970; PTHR14043 (PANTHER), PTHR14043:SF6 (PANTHER)
GB17946	tata-box-binding protein	319	F:DNA binding; P:transcription initiation from RNA polymerase II promoter; P:regulation of transcription, DNA-dependent	IPR000814; IPR012295; PTHR10126:SF14 (PANTHER), SSF55945 (SUPERFAMILY)
GB17993	nuclear transcription factor y subunit gamma-like	323	C:nucleus; F:sequence-specific DNA binding; F:protein heterodimerization activity	IPR003958; IPR009072; PTHR10252 (PANTHER), PTHR10252:SF14 (PANTHER)
GB18009	t-box protein 2	403	F:sequence-specific DNA binding transcription factor activity; C:nucleus	IPR001699; IPR008967; IPR018186; PTHR11267:SF51 (PANTHER)
GB18032	embryonic polarity protein dorsal	436	F:sequence-specific DNA binding transcription factor activity; P:Notch signaling pathway; P:multicellular organismal development; F:calcium ion binding; C:integral to membrane; C:nucleus; P:regulation of transcription, DNA-dependent; F:protein binding	IPR000451; IPR002909; IPR008967; IPR011539; IPR013783; IPR014756; PTHR24169 (PANTHER), PTHR24169:SF8 (PANTHER)
GB18034	t-cell leukemia homeobox protein 3-like	96	F:sequence-specific DNA binding transcription factor activity; F:sequence-specific DNA binding; C:nucleus; P:regulation of transcription, DNA-dependent	IPR001356; IPR009057; PTHR24326 (PANTHER), PTHR24326:SF2 (PANTHER)
GB18036	death-inducer obliterator 1	2133	F:protein binding; F:zinc ion binding; F:DNA binding	IPR001965; IPR003618; IPR006576; IPR011011; IPR012921; IPR013083; IPR017956; IPR019786; IPR019787; PTHR14914 (PANTHER), PTHR14914:SF0 (PANTHER)
GB18063	partial	232	F:sequence-specific DNA binding transcription factor activity; F:sequence-specific DNA binding; P:multicellular organismal development; C:nucleus; P:regulation of transcription, DNA-dependent	no IPS match
GB18090	zinc finger protein 396-like	154	F:zinc ion binding; F:nucleic acid binding; C:intracellular	IPR007087; IPR013087; IPR015880; PTHR23223 (PANTHER), PF13465 (PFAM), SSF57667 (SUPERFAMILY)
GB18093	transcription factor sp4	849	F:zinc ion binding; F:nucleic acid binding; C:intracellular	IPR007087; IPR013087; IPR015880; PTHR23235 (PANTHER), PTHR23235:SF2 (PANTHER), PF13465 (PFAM), SSF57667 (SUPERFAMILY)
GB18094	transcription factor	438	F:sequence-specific DNA binding transcription factor activity; F:sequence-specific DNA binding; C:nucleus; P:regulation of transcription, DNA-dependent	IPR004826; IPR004827; IPR008917; IPR024874; G3DSA:1.20.5.170 (GENE3D), PTHR10129:SF4 (PANTHER)
GB18111	homeobox protein caupolican-like	533	F:sequence-specific DNA binding transcription factor activity; F:sequence-specific DNA binding; C:nucleus; P:regulation of transcription, DNA-dependent	IPR001356; IPR003893; IPR008422; IPR009057; IPR017970; PTHR11211 (PANTHER), PTHR11211:SF2 (PANTHER)
GB18117	cyclic amp response element-binding protein a-like	424	F:sequence-specific DNA binding transcription factor activity; F:sequence-specific DNA binding; F:protein dimerization activity; C:nucleus; P:regulation of transcription, DNA-dependent	IPR001630; IPR004827; IPR008917; G3DSA:1.20.5.170 (GENE3D), PTHR22952 (PANTHER), PTHR22952:SF7 (PANTHER)
GB18215	protein embryonic gonad	422	P:steroid hormone mediated signaling pathway; F:zinc ion binding; P:regulation of transcription, DNA-dependent; F:sequence-specific DNA binding; F:sequence-specific DNA binding transcription factor activity; F:steroid hormone receptor activity; C:nucleus	IPR001628; IPR008946; IPR013088; PTHR24079 (PANTHER), PTHR24079:SF4 (PANTHER), SSF57716 (SUPERFAMILY)
GB18247	gc-rich sequence dna-binding factor 1-like	1897	F:lipid transporter activity; F:sequence-specific DNA binding transcription factor activity; F:DNA binding; P:lipid transport; C:nucleus; P:regulation of transcription, DNA-dependent	IPR001747; IPR011030; IPR012890; IPR015816; IPR015819; IPR022783; PTHR12214:SF0 (PANTHER)
GB18260	doublesex- and mab-3-related transcription factor a2-like	359	F:sequence-specific DNA binding; P:sex differentiation; C:nucleus; P:regulation of transcription, DNA-dependent	IPR001275; IPR005173; IPR026607; PTHR12322:SF16 (PANTHER)
GB18263	zinc finger protein 268-like	938	F:zinc ion binding; F:nucleic acid binding; C:intracellular	IPR007087; IPR013087; IPR015880; PTHR24395 (PANTHER), PTHR24395:SF0 (PANTHER), PF13465 (PFAM), SSF57667 (SUPERFAMILY)
GB18266	homeobox protein mox-2	221	F:sequence-specific DNA binding transcription factor activity; F:sequence-specific DNA binding; C:nucleus; P:regulation of transcription, DNA-dependent	IPR001356; IPR009057; IPR017970; IPR020479; PTHR24328 (PANTHER), PTHR24328:SF1 (PANTHER)
GB18338	broad-complex core protein isoforms 1 2 3 4 5-like	113	F:zinc ion binding; F:nucleic acid binding; C:intracellular	IPR007087; IPR015880; PF13465 (PFAM), SSF57667 (SUPERFAMILY)
GB18348	homeobox protein homothorax-like	470	P:specification of organ identity; P:compound eye photoreceptor fate commitment; P:protein localization to nucleus; P:specification of segmental identity, antennal segment; C:transcription factor complex; P:leg disc proximal/distal pattern formation; P:brain development; P:regulation of neuron differentiation; F:RNA polymerase II distal enhancer sequence-specific DNA binding transcription factor …	IPR001356; IPR008422; IPR009057; PTHR11850 (PANTHER), PTHR11850:SF24 (PANTHER)
GB18358	nuclear receptor subfamily 2 group c member 2	548	P:protein phosphorylation; P:steroid hormone mediated signaling pathway; F:zinc ion binding; F:protein serine/threonine kinase activity; P:regulation of transcription, DNA-dependent; F:sequence-specific DNA binding; F:ATP binding; F:sequence-specific DNA binding transcription factor activity; F:steroid hormone receptor activity; C:nucleus	IPR000536; IPR001628; IPR001723; IPR008946; IPR013088; PTHR24083 (PANTHER), PTHR24083:SF25 (PANTHER), SSF57716 (SUPERFAMILY)
GB18359	krueppel c2h2-type zinc finger	346	F:zinc ion binding; F:nucleic acid binding; C:intracellular	IPR007087; IPR013087; IPR015880; PTHR24375 (PANTHER), PTHR24375:SF0 (PANTHER), PF13465 (PFAM), PF13894 (PFAM), SSF57667 (SUPERFAMILY)
GB18397	paired box protein pax-2-b	583	P:regulation of R7 cell differentiation; P:regulation of retinal cone cell fate specification; P:compound eye cone cell fate commitment; P:dendrite morphogenesis; P:muscle organ development; F:RNA polymerase II distal enhancer sequence-specific DNA binding transcription factor activity; F:DNA binding; P:positive regulation of transcription from RNA polymerase II promoter; C:nucleus	IPR001523; IPR009057; IPR011991; PTHR24329 (PANTHER), PTHR24329:SF3 (PANTHER)
GB18410	ras-responsive element-binding protein 1	1674	F:zinc ion binding; F:nucleic acid binding; C:intracellular	IPR007087; IPR013087; IPR015880; PTHR23233 (PANTHER), PTHR23233:SF22 (PANTHER), PF13465 (PFAM), PF13894 (PFAM), SSF57667 (SUPERFAMILY)
GB18424	zinc finger protein 90-like	757	F:zinc ion binding; F:nucleic acid binding; C:intracellular	IPR007087; IPR013087; IPR015880; PTHR24383 (PANTHER), PTHR24383:SF5 (PANTHER), PF13465 (PFAM), PF13894 (PFAM), PF13912 (PFAM), SSF57667 (SUPERFAMILY)
GB18471	gata-binding factor a	643	F:sequence-specific DNA binding transcription factor activity; F:sequence-specific DNA binding; C:nucleus; F:zinc ion binding; P:regulation of transcription, DNA-dependent	IPR000679; IPR012934; IPR013088; PTHR10071 (PANTHER), PTHR10071:SF109 (PANTHER), SSF57716 (SUPERFAMILY)
GB18541	protein dead ringer-like	736	F:DNA binding; C:intracellular	IPR001606; IPR023334; PTHR15348 (PANTHER), SM01014 (SMART)
GB18548	transcriptional repressor scratch 2	615	F:zinc ion binding; F:nucleic acid binding; C:intracellular	IPR007087; IPR013087; IPR015880; PTHR11389 (PANTHER), PTHR11389:SF343 (PANTHER), PF13465 (PFAM), SSF57667 (SUPERFAMILY)
GB18552	homeobox protein h17	506	F:sequence-specific DNA binding transcription factor activity; F:sequence-specific DNA binding; C:nucleus; P:regulation of transcription, DNA-dependent	IPR001356; IPR009057; IPR017970; IPR020479; PTHR24338 (PANTHER), PTHR24338:SF0 (PANTHER)
GB18560	transcription factor ken 1-like	480	F:nucleic acid binding; C:nucleus; F:zinc ion binding; F:protein binding	IPR000210; IPR007087; IPR011333; IPR013069; IPR013087; IPR015880; PTHR11389 (PANTHER), PF13465 (PFAM), PF13894 (PFAM), SSF57667 (SUPERFAMILY)
GB18576	transcription initiation factor tfiid subunit 12	164	P:translational initiation; F:DNA binding; P:DNA-dependent transcription, initiation; C:transcription factor TFIID complex; F:translation initiation factor activity; F:protein heterodimerization activity	IPR003228; IPR009072; PTHR12264 (PANTHER), PTHR12264:SF7 (PANTHER)
GB18585	protein apterous	429	F:sequence-specific DNA binding transcription factor activity; F:sequence-specific DNA binding; C:nucleus; F:zinc ion binding; P:regulation of transcription, DNA-dependent	IPR001356; IPR001781; IPR009057; IPR017970; PTHR24208 (PANTHER), PTHR24208:SF12 (PANTHER), SSF57716 (SUPERFAMILY)
GB18588	sex determination protein fruitless-like	256	F:metal ion binding; C:intracellular; F:protein binding	IPR000210; IPR007588; IPR011333; IPR013069; PTHR23110 (PANTHER)
GB18613	transforming protein p54 c-ets-1	691	F:sequence-specific DNA binding transcription factor activity; F:sequence-specific DNA binding; C:nucleus; P:regulation of transcription, DNA-dependent	IPR000418; IPR003118; IPR011991; IPR013761; PTHR11849 (PANTHER), PTHR11849:SF44 (PANTHER), SSF46785 (SUPERFAMILY)
GB18625	broad-complex core protein isoform 6	416	F:nucleic acid binding; C:nucleus; F:zinc ion binding; F:protein binding	IPR000210; IPR007087; IPR011333; IPR013069; IPR013087; IPR015880; PTHR23110 (PANTHER), PTHR23110:SF49 (PANTHER), PF13465 (PFAM), SSF57667 (SUPERFAMILY)
GB18696	protein bowel-like	543	F:zinc ion binding; F:nucleic acid binding; C:intracellular	IPR007087; IPR013087; IPR015880; PTHR14196 (PANTHER), PF13465 (PFAM), SSF57667 (SUPERFAMILY)
GB18742	lethal malignant brain tumor-like protein 3-like	1241	F:sequence-specific DNA binding transcription factor activity; C:nucleus; F:zinc ion binding; P:regulation of transcription, DNA-dependent; F:protein binding	IPR001660; IPR002515; IPR004092; IPR013761; IPR021129; G3DSA:2.30.30.160 (GENE3D), PTHR12247 (PANTHER), PTHR12247:SF13 (PANTHER), SSF63748 (SUPERFAMILY)
GB18792	homeobox protein hox-a3-like	369	F:sequence-specific DNA binding transcription factor activity; F:sequence-specific DNA binding; C:nucleus; P:regulation of transcription, DNA-dependent	IPR001356; IPR009057; IPR017970; IPR020479; PTHR24326 (PANTHER), PTHR24326:SF38 (PANTHER)
GB18813	homeotic protein antennapedia	352	F:sequence-specific DNA binding transcription factor activity; F:sequence-specific DNA binding; P:multicellular organismal development; C:nucleus; P:regulation of transcription, DNA-dependent	IPR001356; IPR001827; IPR009057; IPR017970; IPR017995; IPR020479; PTHR24326 (PANTHER), PTHR24326:SF0 (PANTHER)
GB18833	inhibitory pou	364	F:sequence-specific DNA binding transcription factor activity; F:sequence-specific DNA binding; C:nucleus; P:regulation of transcription, DNA-dependent	IPR000327; IPR001356; IPR009057; IPR010982; IPR013847; IPR017970; PTHR11636 (PANTHER), PTHR11636:SF11 (PANTHER)
GB18875	forkhead box protein d3-b-like	284	F:sequence-specific DNA binding transcription factor activity; F:sequence-specific DNA binding; C:nucleus; P:regulation of transcription, DNA-dependent	IPR001766; IPR011991; IPR018122; PTHR11829 (PANTHER), SSF46785 (SUPERFAMILY)
GB18882	transcription factor e2f2-like	416	F:sequence-specific DNA binding transcription factor activity; F:DNA binding; C:transcription factor complex; P:regulation of transcription, DNA-dependent	IPR003316; IPR011991; IPR015633; SSF144074 (SUPERFAMILY), SSF46785 (SUPERFAMILY)
GB18918	zinc finger	665	F:sequence-specific DNA binding transcription factor activity; F:sequence-specific DNA binding; C:nucleus; F:zinc ion binding; P:regulation of transcription, DNA-dependent	IPR001356; IPR007087; IPR009057; IPR013087; IPR015880; PTHR24391 (PANTHER), PTHR24391:SF0 (PANTHER), PF13465 (PFAM), PF13894 (PFAM), SSF57667 (SUPERFAMILY)
GB18923	signal transducer and activator of transcription 5b-like	824	F:sequence-specific DNA binding transcription factor activity; F:signal transducer activity; F:calcium ion binding; P:signal transduction; C:nucleus; P:regulation of transcription, DNA-dependent; F:protein binding	IPR000980; IPR001217; IPR008967; IPR011992; IPR012345; IPR013799; IPR013800; IPR013801; IPR015988; PTHR11801:SF5 (PANTHER), SSF55550 (SUPERFAMILY)
GB18940	homeobox protein hox-	487	F:sequence-specific DNA binding transcription factor activity; P:multicellular organismal development; F:adenosine deaminase activity; F:transcription regulatory region sequence-specific DNA binding; C:nucleus; P:regulation of transcription, DNA-dependent	IPR001356; IPR009057; IPR017970; IPR020479; PTHR24326 (PANTHER), PTHR24326:SF0 (PANTHER)
GB18981	mothers against decapentaplegic homolog 4-like	616	F:sequence-specific DNA binding transcription factor activity; C:transcription factor complex; P:regulation of transcription, DNA-dependent; P:transforming growth factor beta receptor signaling pathway; F:protein binding	IPR001132; IPR003619; IPR008984; IPR013019; IPR013790; IPR017855; PTHR13703:SF13 (PANTHER)
GB19033	protein abrupt	591	F:nucleic acid binding; C:nucleus; F:zinc ion binding; F:protein binding	IPR000210; IPR007087; IPR011333; IPR013069; IPR013087; IPR015880; PTHR23110 (PANTHER), PTHR23110:SF32 (PANTHER), SSF57667 (SUPERFAMILY)
GB19036	tata-box-binding protein	241	F:DNA binding; P:transcription initiation from RNA polymerase II promoter; P:regulation of transcription, DNA-dependent	IPR000814; IPR012295; SSF55945 (SUPERFAMILY)
GB19037	homeotic protein spalt-major	1740	F:zinc ion binding; F:nucleic acid binding; C:intracellular	IPR007087; IPR013087; IPR015880; PTHR23233 (PANTHER), PTHR23233:SF20 (PANTHER), PF13465 (PFAM), PF13894 (PFAM), SSF57667 (SUPERFAMILY)
GB19102	zinc finger protein 721-like	633	F:nucleic acid binding; C:nucleus; F:zinc ion binding	IPR007087; IPR012934; IPR013087; IPR015880; PTHR24402 (PANTHER), PTHR24402:SF54 (PANTHER), PF13465 (PFAM), PF13912 (PFAM), SSF57667 (SUPERFAMILY), SSF57716 (SUPERFAMILY)
GB19109	zinc finger protein 484-like	749	F:zinc ion binding; F:nucleic acid binding; C:nucleus	IPR007087; IPR012934; IPR013087; IPR015880; PTHR24402 (PANTHER), PTHR24402:SF3 (PANTHER), PF13465 (PFAM), PF13894 (PFAM), SSF57667 (SUPERFAMILY), SSF57716 (SUPERFAMILY)
GB19138	metal regulatory transcription factor 1	849	P:response to oxidative stress; F:zinc ion binding; F:histone acetyltransferase binding; F:RNA polymerase II core promoter sequence-specific DNA binding; P:positive regulation of transcription from RNA polymerase II promoter; F:sequence-specific DNA binding transcription factor activity; P:response to cadmium ion; C:nucleus	IPR007087; IPR013087; IPR015880; PTHR11389 (PANTHER), PTHR11389:SF347 (PANTHER), PF13465 (PFAM), SSF57667 (SUPERFAMILY)
GB19158	tata box-binding protein 1-like	257	F:DNA binding; P:transcription initiation from RNA polymerase II promoter; P:regulation of transcription, DNA-dependent	IPR000814; IPR012295; IPR015445; SSF55945 (SUPERFAMILY)
GB19187	mothers against decapentaplegic homolog 6-like	235	P:regulation of transcription, DNA-dependent; F:protein binding; F:sequence-specific DNA binding transcription factor activity; C:transcription factor complex; P:transforming growth factor beta receptor signaling pathway	IPR001132; IPR003619; IPR008984; IPR013019; IPR013790; IPR017855; PTHR13703:SF20 (PANTHER)
GB19235	u4 u6 small nuclear ribonucleoprotein prp4-like	525	F:nucleic acid binding; C:ribonucleoprotein complex; P:RNA splicing; F:protein binding	IPR001680; IPR003648; IPR014906; IPR015943; IPR017986; IPR019775; IPR020472; PTHR19846 (PANTHER)
GB19335	gastrula zinc finger	571	F:zinc ion binding; F:nucleic acid binding; C:intracellular	IPR007087; IPR013087; IPR015880; PTHR23225 (PANTHER), PF13465 (PFAM), PF13894 (PFAM), SSF57667 (SUPERFAMILY)
GB19338	activating transcription factor of chaperone-like	357	P:protein folding; F:sequence-specific DNA binding transcription factor activity; F:sequence-specific DNA binding; F:protein dimerization activity; F:calcium ion binding; F:unfolded protein binding; C:endoplasmic reticulum; P:regulation of transcription, DNA-dependent	IPR004827; G3DSA:1.20.5.170 (GENE3D), PTHR13044 (PANTHER), PTHR13044:SF1 (PANTHER)
GB19404	nuclear transcription factor y subunit beta-like	219	F:sequence-specific DNA binding; C:nucleus; P:regulation of transcription, DNA-dependent; F:protein heterodimerization activity	IPR003956; IPR003957; IPR003958; IPR009072; PTHR11064 (PANTHER)
GB19470	early growth response protein 1	161	F:zinc ion binding; F:nucleic acid binding; C:intracellular	IPR007087; IPR013087; IPR015880; PTHR23229 (PANTHER), PTHR23229:SF46 (PANTHER), PF13465 (PFAM), SSF57667 (SUPERFAMILY)
GB19475	enhancer of split mgamma	207	F:DNA binding; C:nucleus; P:regulation of transcription, DNA-dependent; F:protein dimerization activity	IPR003650; IPR011598; IPR018352; PTHR10985 (PANTHER), PTHR10985:SF12 (PANTHER)
GB19482	runt-related transcription factor 1-like	489	F:sequence-specific DNA binding transcription factor activity; F:DNA binding; F:ATP binding; C:nucleus; P:regulation of transcription, DNA-dependent	IPR000040; IPR008967; IPR012346; IPR013524
GB19521	zinc finger protein	1091	F:zinc ion binding; F:nucleic acid binding; C:intracellular	IPR007087; IPR013087; IPR015880; PTHR24409 (PANTHER), PTHR24409:SF6 (PANTHER), PF13465 (PFAM), PF13894 (PFAM), PF13912 (PFAM), SSF57667 (SUPERFAMILY)
GB19537	embryonic polarity	810	F:sequence-specific DNA binding transcription factor activity; P:Notch signaling pathway; P:multicellular organismal development; F:calcium ion binding; C:integral to membrane; C:nucleus; P:regulation of transcription, DNA-dependent; F:protein binding	IPR000451; IPR002909; IPR008967; IPR011539; IPR013783; IPR014756; PTHR24169 (PANTHER), PTHR24169:SF8 (PANTHER)
GB19562	zinc finger protein 40	1371	F:zinc ion binding; F:nucleic acid binding; C:intracellular	IPR007087; IPR013087; IPR015880; PTHR23233 (PANTHER), PTHR23233:SF13 (PANTHER), PF13465 (PFAM), PF13894 (PFAM), SSF57667 (SUPERFAMILY)
GB19572	zinc finger protein 91	689	F:zinc ion binding; F:nucleic acid binding; C:intracellular	IPR007087; IPR013087; IPR015880; PTHR11389 (PANTHER), PF12874 (PFAM), PF13465 (PFAM), PF13912 (PFAM), SSF57667 (SUPERFAMILY)
GB19607	mothers against decapentaplegic homolog 3	417	F:sequence-specific DNA binding transcription factor activity; P:thyroid gland development; C:SMAD protein complex; P:regulation of striated muscle tissue development; P:negative regulation of inflammatory response; F:ubiquitin binding; F:protein homodimerization activity; P:pericardium development; P:lens fiber cell differentiation; P:in utero embryonic development; P:regulation of transforming …	IPR001132; IPR003619; IPR008984; IPR013019; IPR013790; IPR017855; PTHR13703:SF19 (PANTHER)
GB19622	pancreas transcription factor 1 subunit alpha-like isoform 1	243	F:protein dimerization activity	IPR011598; PTHR23349 (PANTHER), PTHR23349:SF16 (PANTHER)
GB19628	ecotropic virus integration site 1 protein	373	F:zinc ion binding; F:nucleic acid binding; C:intracellular	IPR007087; IPR013087; IPR015880; PTHR24393 (PANTHER), PTHR24393:SF0 (PANTHER), PF13465 (PFAM), SSF57667 (SUPERFAMILY)
GB19677	transcription factor 12-like	597	F:protein dimerization activity	IPR011598; PTHR11793 (PANTHER)
GB19687	uncharacterized zinc finger protein 814-like	1451	F:zinc ion binding; F:nucleic acid binding; C:intracellular	IPR007087; IPR013087; IPR015880; PTHR24406 (PANTHER), PTHR24406:SF0 (PANTHER), PF13465 (PFAM), PF13894 (PFAM), PF13912 (PFAM), SSF57667 (SUPERFAMILY)
GB19717	retinal homeobox protein rx-like	282	F:sequence-specific DNA binding transcription factor activity; F:sequence-specific DNA binding; P:multicellular organismal development; C:nucleus; P:regulation of transcription, DNA-dependent	IPR001356; IPR003654; IPR009057; IPR017970; PTHR24329 (PANTHER), PTHR24329:SF74 (PANTHER)
GB19738	homeobox protein abdominal-a homolog isoform 1	399	F:sequence-specific DNA binding transcription factor activity; F:sequence-specific DNA binding; C:nucleus; P:regulation of transcription, DNA-dependent	IPR001356; IPR009057; IPR017970; IPR020479; IPR022132; PTHR24326 (PANTHER), PTHR24326:SF0 (PANTHER), PS51257 (PROFILE)
GB19838	zinc finger protein jing-like protein	777	F:zinc ion binding; F:nucleic acid binding; C:intracellular	IPR007087; IPR013087; IPR015880; PTHR19818 (PANTHER), PTHR19818:SF9 (PANTHER), SSF57667 (SUPERFAMILY)
GB19849	zinc finger protein 782	549	F:nucleic acid binding; C:nucleus; F:zinc ion binding; F:protein binding	IPR000210; IPR007087; IPR011333; IPR013069; IPR013087; IPR015880; PTHR24375 (PANTHER), PF13465 (PFAM), PF13912 (PFAM), SSF57667 (SUPERFAMILY)
GB19877	lim homeobox transcription factor 1-beta-like	402	F:sequence-specific DNA binding transcription factor activity; F:sequence-specific DNA binding; C:nucleus; F:zinc ion binding; P:regulation of transcription, DNA-dependent	IPR001356; IPR001781; IPR009057; IPR017970; PTHR24208 (PANTHER), PTHR24208:SF4 (PANTHER), SSF57716 (SUPERFAMILY)
GB19879	zinc finger protein 347-like	576	F:zinc ion binding; F:nucleic acid binding; C:intracellular	IPR007087; IPR013087; IPR015880; PTHR23228 (PANTHER), PTHR23228:SF83 (PANTHER), PF13465 (PFAM), PF13894 (PFAM), SSF57667 (SUPERFAMILY)
GB19883	homeobox protein	398	F:sequence-specific DNA binding transcription factor activity; F:sequence-specific DNA binding; P:multicellular organismal development; C:nucleus; P:regulation of transcription, DNA-dependent	IPR001356; IPR003654; IPR009057; IPR017970; IPR023339; PTHR24329 (PANTHER), PTHR24329:SF148 (PANTHER)
GB19895	gata-binding factor a	333	P:steroid hormone mediated signaling pathway; F:zinc ion binding; P:regulation of transcription, DNA-dependent; F:sequence-specific DNA binding; F:sequence-specific DNA binding transcription factor activity; F:steroid hormone receptor activity; C:nucleus	IPR000679; IPR013088; PTHR10071 (PANTHER), SSF57716 (SUPERFAMILY)
GB19906	transcription factor glial cells missing	668	F:DNA binding; P:regulation of transcription, DNA-dependent	IPR003902; PTHR12414:SF0 (PANTHER)
GB19937	transcription factor sox-2-like	506	F:protein binding	IPR009071; IPR022097; PTHR10270 (PANTHER), PTHR10270:SF160 (PANTHER)
GB19951	transcription factor sox-8	347	F:protein binding	IPR009071; IPR022151; PTHR10270 (PANTHER), PTHR10270:SF19 (PANTHER)
GB19963	fez family zinc finger protein 2-like	250	F:zinc ion binding; F:nucleic acid binding; C:intracellular	IPR007087; IPR013087; IPR015880; PTHR23228 (PANTHER), PTHR23228:SF44 (PANTHER), PF13465 (PFAM), PF13912 (PFAM), SSF57667 (SUPERFAMILY)
GB19971	zinc finger protein 836-like	177	F:zinc ion binding; F:nucleic acid binding; C:intracellular	IPR007087; IPR013087; IPR015880; PTHR24402 (PANTHER), PF13465 (PFAM), SSF57667 (SUPERFAMILY)
GB19977	protein hunchback	646	P:segmentation; C:nucleus; F:DNA binding; F:zinc ion binding	IPR007087; IPR013087; IPR015880; PTHR10032 (PANTHER), PTHR10032:SF69 (PANTHER), PF13465 (PFAM), SSF57667 (SUPERFAMILY)
GB19998	dna-binding protein satb1	624	F:sequence-specific DNA binding transcription factor activity; F:sequence-specific DNA binding; C:nucleus; P:regulation of transcription, DNA-dependent	IPR001356; IPR009057; PTHR15116 (PANTHER), PTHR15116:SF2 (PANTHER)
GB20007	zinc finger protein 836-like	856	F:nucleic acid binding; F:zinc ion binding; C:nucleus	IPR006612; IPR007087; IPR012934; IPR013087; IPR015880; PTHR24377 (PANTHER), PTHR24377:SF0 (PANTHER), PF13465 (PFAM), PF13894 (PFAM), PF13912 (PFAM), SSF57667 (SUPERFAMILY), SSF57716 (SUPERFAMILY)
GB20009	homeobox protein rough-like	309	F:sequence-specific DNA binding transcription factor activity; F:transcription regulatory region sequence-specific DNA binding; C:nucleus; P:regulation of transcription, DNA-dependent	IPR001356; IPR009057; IPR017970; IPR020479; PTHR24326 (PANTHER), PTHR24326:SF17 (PANTHER)
GB20010	homeobox protein prophet of pit-1	267	F:sequence-specific DNA binding transcription factor activity; F:sequence-specific DNA binding; C:nucleus; P:regulation of transcription, DNA-dependent	IPR001356; IPR009057; PTHR24329 (PANTHER), PTHR24329:SF62 (PANTHER)
GB20051	zinc finger protein 224-like	293	F:zinc ion binding; F:nucleic acid binding; C:intracellular	IPR007087; IPR013087; IPR015880; PTHR24375 (PANTHER), PTHR24375:SF0 (PANTHER), PF13465 (PFAM), PF13894 (PFAM), SSF57667 (SUPERFAMILY)
GB20053	nuclear receptor subfamily 2 group e member 1-like	377	P:steroid hormone mediated signaling pathway; F:zinc ion binding; P:regulation of transcription, DNA-dependent; F:sequence-specific DNA binding; F:sequence-specific DNA binding transcription factor activity; F:steroid hormone receptor activity; C:nucleus	IPR000536; IPR001628; IPR001723; IPR008946; IPR013088; PTHR24083 (PANTHER), PTHR24083:SF0 (PANTHER), SSF57716 (SUPERFAMILY)
GB20118	forkhead box protein k2-like	528	F:sequence-specific DNA binding transcription factor activity; F:sequence-specific DNA binding; P:regulation of transcription, DNA-dependent; F:protein binding	IPR000253; IPR001766; IPR008984; IPR011991; IPR018122; PTHR11829 (PANTHER), PTHR11829:SF50 (PANTHER), SSF46785 (SUPERFAMILY)
GB20147	pancreas transcription factor 1 subunit alpha-like isoform 1	243	F:protein dimerization activity	IPR011598; PTHR23349 (PANTHER), PTHR23349:SF16 (PANTHER)
GB30062	neuronal pas domain-containing	434	F:ligase activity; F:receptor activity; F:signal transducer activity; P:signal transduction; P:regulation of transcription, DNA-dependent; F:protein dimerization activity	IPR000014; IPR011598; IPR013767; G3DSA:3.30.450.20 (GENE3D), PTHR10684 (PANTHER), SSF55785 (SUPERFAMILY)
GB30077	homeotic protein ultrabithorax-like	330	F:sequence-specific DNA binding transcription factor activity; F:sequence-specific DNA binding; P:multicellular organismal development; C:nucleus; P:regulation of transcription, DNA-dependent	IPR001356; IPR001827; IPR009057; IPR017970; IPR020479; PTHR24326 (PANTHER), PTHR24326:SF0 (PANTHER)
GB30092	nuclear transcription factor y subunit gamma-like	346	C:nucleus; F:sequence-specific DNA binding; F:protein heterodimerization activity	IPR003958; IPR009072; PTHR10252 (PANTHER), PTHR10252:SF14 (PANTHER)
GB30099	homeobox protein orthopedia-like	369	F:sequence-specific DNA binding transcription factor activity; C:nucleus; P:regulation of transcription, DNA-dependent; F:transcription regulatory region sequence-specific DNA binding	IPR000047; IPR001356; IPR003654; IPR009057; IPR017970; PTHR24329 (PANTHER), PTHR24329:SF157 (PANTHER)
GB30110	nuclear receptor subfamily 2 group e member 1-like	299	P:transcription, DNA-dependent; F:catalytic activity; F:sequence-specific DNA binding transcription factor activity; F:steroid hormone receptor activity; C:nucleus; P:steroid hormone mediated signaling pathway; F:zinc ion binding; F:sequence-specific DNA binding	IPR000536; IPR001628; IPR001723; IPR008946; IPR013088; PTHR24083 (PANTHER), PTHR24083:SF32 (PANTHER), SSF57716 (SUPERFAMILY)
GB30111	lim homeobox protein lhx9-like	384	F:zinc ion binding; P:regulation of transcription, DNA-dependent; F:sequence-specific DNA binding; F:sequence-specific DNA binding transcription factor activity; C:nucleus	IPR001356; IPR001781; IPR009057; IPR017970; PTHR24208 (PANTHER), PTHR24208:SF12 (PANTHER), SSF57716 (SUPERFAMILY)
GB30126	nuclear factor 1 x-type-like isoform 1	601	P:DNA replication; F:sequence-specific DNA binding transcription factor activity; C:nucleus; P:regulation of transcription, DNA-dependent	IPR000647; IPR003619; IPR019548; IPR020604
GB30139	protein trachealess-like isoform 1	928	F:signal transducer activity; F:DNA binding; P:signal transduction; C:nucleus; P:regulation of transcription, DNA-dependent; F:protein dimerization activity	IPR000014; IPR001610; IPR011598; IPR013655; IPR013767; G3DSA:3.30.450.20 (GENE3D), PTHR23043 (PANTHER), PTHR23043:SF4 (PANTHER), SSF55785 (SUPERFAMILY)
GB30148	dorsal root ganglia homeobox protein	485	F:sequence-specific DNA binding transcription factor activity; F:sequence-specific DNA binding; P:multicellular organismal development; C:nucleus; P:regulation of transcription, DNA-dependent	IPR001356; IPR003654; IPR009057; IPR017970; PTHR24329 (PANTHER)
GB30150	broad-complex core protein isoforms 1 2 3 4 5	428	F:nucleic acid binding; C:nucleus; F:zinc ion binding; F:protein binding	IPR000210; IPR007087; IPR011333; IPR013069; IPR013087; IPR015880; PTHR23110 (PANTHER), PTHR23110:SF49 (PANTHER), SSF57667 (SUPERFAMILY)
GB30158	protein abrupt-like	870	F:nucleic acid binding; C:nucleus; F:zinc ion binding; F:protein binding	IPR000210; IPR007087; IPR011333; IPR013069; IPR013087; IPR015880; PTHR23110 (PANTHER), PTHR23110:SF32 (PANTHER), PF13894 (PFAM), SSF57667 (SUPERFAMILY)
GB30187	myelin transcription factor 1-like protein	1012	F:sequence-specific DNA binding transcription factor activity; C:nucleus; F:zinc ion binding; P:regulation of transcription, DNA-dependent	IPR002515; PTHR10816 (PANTHER), PTHR10816:SF6 (PANTHER), SSF103637 (SUPERFAMILY)
GB30189	nuclear transcription factor y subunit alpha-like	371	F:sequence-specific DNA binding transcription factor activity; F:DNA binding; C:CCAAT-binding factor complex; P:regulation of transcription, DNA-dependent	IPR001289; IPR018362
GB30190	transcription factor capicua	1329	F:protein binding	IPR009071; PTHR13059 (PANTHER), PTHR13059:SF2 (PANTHER)
GB30205	isoform a	548	P:mesodermal cell fate determination; P:embryonic pattern specification; F:RNA polymerase II core promoter proximal region sequence-specific DNA binding transcription factor activity involved in positive regulation of transcription; P:heart development; P:regulation of hemocyte differentiation; C:transcription factor complex; P:regulation of Wnt receptor signaling pathway; P:regulation of stem ce…	IPR009071; IPR013558; IPR024940; G3DSA:4.10.900.10 (GENE3D), PTHR10373:SF12 (PANTHER)
GB30207	protein cbfa2t2	703	F:zinc ion binding; F:sequence-specific DNA binding transcription factor activity	IPR002893; IPR003894; IPR013289; IPR014896; PTHR10379 (PANTHER), SSF144232 (SUPERFAMILY)
GB30211	embryonic polarity protein dorsal	602	F:sequence-specific DNA binding transcription factor activity; P:Notch signaling pathway; P:multicellular organismal development; F:calcium ion binding; C:integral to membrane; C:nucleus; P:regulation of transcription, DNA-dependent; F:protein binding	IPR000451; IPR002909; IPR008967; IPR011363; IPR011539; IPR013783; IPR014756; PTHR24169 (PANTHER), PTHR24169:SF8 (PANTHER)
GB30215	transcription factor kayak	300	F:sequence-specific DNA binding transcription factor activity; F:sequence-specific DNA binding; F:protein dimerization activity; C:nucleus; P:regulation of transcription, DNA-dependent	IPR000837; IPR004827; G3DSA:1.20.5.170 (GENE3D), PTHR23351 (PANTHER), PTHR23351:SF2 (PANTHER)
GB30226	ecdysone-induced protein 78c	595	P:steroid hormone mediated signaling pathway; F:zinc ion binding; P:regulation of transcription, DNA-dependent; F:thyroid hormone receptor activity; F:sequence-specific DNA binding; F:steroid hormone receptor activity; C:nucleus	IPR000536; IPR001628; IPR001723; IPR001728; IPR008946; IPR013088; PTHR24082 (PANTHER), PTHR24082:SF30 (PANTHER), SSF57716 (SUPERFAMILY)
GB30234	dna-binding protein d-ets-3-like	305	F:sequence-specific DNA binding transcription factor activity; F:sequence-specific DNA binding; C:nucleus; P:regulation of transcription, DNA-dependent	IPR000418; IPR011991; PTHR11849 (PANTHER), PTHR11849:SF37 (PANTHER), SSF46785 (SUPERFAMILY)
GB30291	homeobox protein aristaless-like	279	F:sequence-specific DNA binding transcription factor activity; F:transcription regulatory region sequence-specific DNA binding; C:nucleus; P:regulation of transcription, DNA-dependent	IPR001356; IPR009057; PTHR24329 (PANTHER), PTHR24329:SF87 (PANTHER)
GB30292	zinc finger protein 726-like	153	F:zinc ion binding; F:nucleic acid binding; C:intracellular	IPR007087; IPR013087; IPR015880; PTHR23228 (PANTHER), PTHR23228:SF87 (PANTHER), PF12874 (PFAM), PF13465 (PFAM), PF13912 (PFAM), SSF57667 (SUPERFAMILY)
GB30298	ecdysone receptor-like isoform 2	574	P:steroid hormone mediated signaling pathway; F:zinc ion binding; P:regulation of transcription, DNA-dependent; P:ecdysone receptor-mediated signaling pathway; F:steroid binding; F:sequence-specific DNA binding; C:nucleus; F:ecdysteroid hormone receptor activity	IPR000536; IPR001628; IPR001723; IPR003069; IPR008946; IPR013088; PTHR24082 (PANTHER), PTHR24082:SF7 (PANTHER), SSF57716 (SUPERFAMILY)
GB30303	zinc finger protein 780a-like	331	F:zinc ion binding; F:nucleic acid binding; C:intracellular	IPR007087; IPR013087; IPR015880; PTHR23223 (PANTHER), PTHR23223:SF42 (PANTHER), PF13465 (PFAM), SSF57667 (SUPERFAMILY)
GB30309	zinc finger protein 160-like	575	F:zinc ion binding; F:nucleic acid binding; C:intracellular	IPR007087; IPR013087; IPR015880; PTHR24377 (PANTHER), PTHR24377:SF0 (PANTHER), PF13465 (PFAM), PF13894 (PFAM), SSF57667 (SUPERFAMILY)
GB30330	dorsal root ganglia homeobox protein	110	F:sequence-specific DNA binding transcription factor activity; F:sequence-specific DNA binding; P:multicellular organismal development; C:nucleus; P:regulation of transcription, DNA-dependent	IPR001356; IPR009057; PTHR24329 (PANTHER), PTHR24329:SF91 (PANTHER)
GB30349	transcription initiation factor tfiid subunit 1	2136	P:translational initiation; F:translation initiation factor activity; F:protein binding; F:zinc ion binding; C:intracellular	IPR000210; IPR001487; IPR007087; IPR011333; IPR013069; IPR013087; IPR015880; IPR018359; IPR022591; PTHR13900 (PANTHER), PTHR13900:SF0 (PANTHER), SSF57667 (SUPERFAMILY)
GB30353	t-cell leukemia homeobox protein 3-like	404	F:sequence-specific DNA binding transcription factor activity; F:sequence-specific DNA binding; C:nucleus; P:regulation of transcription, DNA-dependent	IPR001356; IPR009057; IPR017970; PTHR24326 (PANTHER), PTHR24326:SF2 (PANTHER)
GB30359	nuclear factor nf-kappa-b p105 subunit	613	F:sequence-specific DNA binding transcription factor activity; C:nucleus; P:regulation of transcription, DNA-dependent; F:protein binding	IPR000451; IPR002110; IPR002909; IPR011029; IPR013783; IPR014756; IPR020683; PTHR24169 (PANTHER)
GB30371	zinc finger protein glis3	630	F:zinc ion binding; F:nucleic acid binding; C:intracellular	IPR007087; IPR013087; IPR015880; PTHR19818 (PANTHER), PTHR19818:SF39 (PANTHER), PF13465 (PFAM), SSF57667 (SUPERFAMILY)
GB30381	gc-rich sequence dna-binding factor 1-like	808	F:lipid transporter activity; F:sequence-specific DNA binding transcription factor activity; F:DNA binding; P:lipid transport; C:nucleus; P:regulation of transcription, DNA-dependent	IPR012890; IPR022783; PTHR12214:SF0 (PANTHER)
GB30404	zinc finger	328	F:zinc ion binding; F:nucleic acid binding; C:intracellular	IPR007087; IPR013087; IPR015880; PTHR23223 (PANTHER), PTHR23223:SF19 (PANTHER), PF13465 (PFAM), SSF57667 (SUPERFAMILY)
GB30426	homeobox protein b-h1	147	F:sequence-specific DNA binding transcription factor activity; F:sequence-specific DNA binding; C:nucleus; P:regulation of transcription, DNA-dependent	IPR001356; IPR009057; IPR020479; PTHR24330 (PANTHER), PTHR24330:SF0 (PANTHER)
GB30508	hepatic leukemia factor	266	F:RNA polymerase II core promoter proximal region sequence-specific DNA binding transcription factor activity involved in positive regulation of transcription; P:regulation of transcription, DNA-dependent; P:growth; P:response to nutrient; P:circadian rhythm; F:sequence-specific DNA binding; P:mitosis; P:DNA endoreduplication; F:protein homodimerization activity; C:nucleus	IPR004827; G3DSA:1.20.5.170 (GENE3D), PTHR11988 (PANTHER), PTHR11988:SF5 (PANTHER)
